# Supplementary material for: Requirement for ERK MAP kinase in mouse preimplantation development
Source: Oxford University Press journal article supplement (doi:10.1242/dev.003756), 2007-07-05
Supplement: dev003756tables1.pdf [file dev003756tables1.pdf]

Table S1. Array data for genes in groups 1 to 8

| Group 1      |                |               | 11 genes (12 probe sets) |                |                |             |             |            |
|--------------|----------------|---------------|--------------------------|----------------|----------------|-------------|-------------|------------|
| Probe set ID | Entrez gene ID | Gene symbol   | cont.1.5 (n=2)           | cont.2.5 (n=2) | cont.3.5 (n=2) | u2.5 (n=2)  | u3.5 (n=2)  | u4.5 (n=2) |
| 1418747_at   | 20375          | Sfpi1         | 13.9±1.8                 | 50.3±5.7       | 39±9.6         | 19.7±0.3    | 42±14.1     | 32±5.6     |
| 1455699_at   |                |               | 20.7±1.4                 | 100.3±20.7     | 54.3±3.2       | 27.4±8.3    | 63.6±14.8   | 32±6.6     |
| 1437694_at   |                |               | 73.4±10.1                | 363.9±77.2     | 165.5±5        | 125.1±16.8  | 224.8±28.7  | 134.7±53.4 |
| 1435070_at   |                |               | 91.7±5.9                 | 466.6±70.6     | 222±45.4       | 218.5±64.5  | 292.6±41.4  | 155.9±18.9 |
| 1420688_a_at | 20392          | Sgce          | 17.5±7.8                 | 108.8±16.6     | 48.7±2         | 36.5±12.5   | 74±2.3      | 29.2±5     |
| 1436585_at   |                |               | 102.4±4.7                | 672.4±175.6    | 317.3±67       | 161.5±96.5  | 419±49.5    | 175.7±18.1 |
| 1417342_at   | 66849          | Ppp1r2        | 16.7±0.1                 | 113.8±43.8     | 49.4±6.2       | 40.2±6.9    | 78.6±28.6   | 36.8±5.3   |
| 1437502_x_at | 12484          | Cd24a         | 28.4±1.6                 | 213.5±28.8     | 34.2±16.5      | 26.1±6.7    | 121.7±45.7  | 40.5±3.3   |
| 1433789_at   |                |               | 352±40                   | 2727.1±634.7   | 671.5±115.3    | 429.9±82.7  | 1428.6±304  | 358.4±55.2 |
| 1448182_a_at | 12484          | Cd24a         | 39.1±5.9                 | 336.8±34.8     | 55.2±23.9      | 54.1±19.4   | 175.2±42.8  | 88.4±13.5  |
| 1428583_at   | 68564          | 1110001M19Rik | 125.8±26.4               | 1256.2±134.7   | 575.5±211.1    | 187.3±137.7 | 827.7±163.7 | 427.9±105  |
| 1441298_at   |                |               | 11.9±0.2                 | 126.5±39.7     | 25.4±3.3       | 41.7±9.3    | 44±9.9      | 13.4±0.6   |

| Group 2      |                |               | 248 genes (293 probe sets) |                |                |              |              |              |
|--------------|----------------|---------------|----------------------------|----------------|----------------|--------------|--------------|--------------|
| Probe set ID | Entrez gene ID | Gene symbol   | cont.1.5 (n=2)             | cont.2.5 (n=2) | cont.3.5 (n=2) | u2.5 (n=2)   | u3.5 (n=2)   | u4.5 (n=2)   |
| 1450937_at   | 22343          | Lin7c         | 265.2±7.6                  | 1183.4±139.7   | 1246.6±115.3   | 685.4±57.1   | 819.8±111.3  | 819.6±164.8  |
| 1437658_a_at |                |               | 51.4±0.8                   | 193.3±41.7     | 196.3±27.2     | 52.4±14.6    | 159.1±10.9   | 271.6±24.7   |
| 1438230_at   | 225467         | Pggt1b        | 17±3.9                     | 82.8±21        | 61.8±1.9       | 17.1±1.9     | 53.9±14.7    | 98.2±28.5    |
| 1435139_at   | 74838          | Narg1         | 17±5.6                     | 66.5±0.7       | 136.8±5.1      | 63.9±12.7    | 55±0.4       | 138.8±3.5    |
| 1447171_at   |                |               | 7.8±0.2                    | 63.1±1         | 35±15.8        | 14.3±6.3     | 27±4.8       | 40.6±11      |
| 1436067_at   | 229055         | Zbtb10        | 83.2±1.7                   | 577.6±67.4     | 296.2±0.6      | 233.7±87     | 295.7±10.1   | 466.9±5.2    |
| 1447122_at   |                |               | 25.1±8.6                   | 90.2±6.4       | 168.3±44.3     | 28.1±2.1     | 90.6±6       | 101.3±10.5   |
| 1452864_at   | 329650         | Med12l        | 84.6±27.8                  | 293.6±19.2     | 577.5±29.3     | 108±27.1     | 306.6±30.6   | 909.8±55.2   |
| 1420879_a_at | 54401          | Ywhab         | 512.4±171.1                | 2214.3±191     | 1742.2±179.9   | 833.1±174.2  | 1863.3±434.5 | 2068.9±437.6 |
| 1452712_at   | 229279         | Hnrpa3        | 251.9±4.3                  | 838.9±55.8     | 805.9±28.7     | 479±20.1     | 919.7±175.3  | 1078.5±103.6 |
| 1435881_at   | 18521          | Pcbp2         | 57.7±13.7                  | 253.2±28.2     | 174.8±15.4     | 72.2±13.1    | 216.3±58.8   | 363.2±94     |
| 1457079_at   |                |               | 5.2±0.1                    | 21.7±0.4       | 25.2±2.4       | 7.5±2.9      | 19.7±2.1     | 21.8±2.6     |
| 1437593_x_at | 11800          | Api5          | 2060.4±467.8               | 8827.8±502     | 9320±309       | 4520.2±94.8  | 7975.3±987.3 | 7051.6±18.2  |
| 1428362_at   | 77989          | E130105L11Rik | 229±79.9                   | 1107±125.5     | 786.7±38       | 163.4±54.5   | 889.4±25     | 1003.2±145.3 |
| 1437714_x_at | 59025          | Usp14         | 152.1±17.3                 | 639.2±114.8    | 819.2±14.5     | 287.3±36.7   | 602.7±83.2   | 522.7±94.5   |
| 1448526_at   | 16211          | Kpnb1         | 315.4±156.6                | 2002.5±1.2     | 1142.2±129.3   | 703.7±127.4  | 1249.9±56.3  | 1512.4±383   |
| 1420478_at   | 53605          | Nap1l1        | 597.4±87.7                 | 3005.7±317.3   | 3042.9±275.6   | 1698.7±40.9  | 2380.3±430   | 2402.9±212   |
| 1438671_at   |                |               | 11.6±1.8                   | 82.3±5.6       | 64.3±3.2       | 18.5±1.5     | 46.8±11.1    | 39.4±13.1    |
| 1440085_at   |                |               | 9.8±4                      | 33.5±9.7       | 33.5±5.4       | 12.5±1.4     | 39.9±2.2     | 48.7±0.3     |
| 1435235_at   | 53382          | Txn1l         | 58.8±6                     | 226.3±11.9     | 408.4±65.7     | 104.5±8.4    | 244±49       | 540.8±25.7   |
| 1418515_at   | 17765          | Mtf2          | 546.6±193.9                | 2293.1±315.9   | 3301.2±771.8   | 953.8±180.5  | 2295.1±91.1  | 2788.4±33.6  |
| 1424723_s_at | 228410         | Cstf3         | 155.7±46.5                 | 639.8±136.5    | 772.3±139.4    | 221.9±44.4   | 655.5±43     | 583.8±110.8  |
| 1438650_x_at | 14609          | Gja1          | 1303.9±348                 | 6327.2±351.8   | 6508.1±20.8    | 3163.3±600.4 | 5760.7±272.9 | 4533.2±174.3 |
| 1422045_a_at | 19248          | Ptpn12        | 700.3±53.3                 | 3183.9±206.5   | 3849±184.8     | 1556.3±373.1 | 3094.1±245.1 | 2885.8±12.1  |
| 1432418_a_at | 12716          | Ckmt1         | 7.9±0.4                    | 36.7±15.9      | 29.9±8.6       | 10.1±0.3     | 35.6±4.1     | 54.2±11.5    |
| 1437533_at   | 11798          | Birc4         | 115.7±49                   | 644.6±21.3     | 478.9±37.4     | 227.6±55.7   | 522±26       | 483.6±62.1   |

|              |        |               |               |                |                |               |                |               |
|--------------|--------|---------------|---------------|----------------|----------------|---------------|----------------|---------------|
| 1417404_at   | 170439 | Elov16        | 572.3±155.6   | 2588.1±278.5   | 2542.7±417.1   | 1025±5.6      | 2585.9±49.7    | 4209.4±24.5   |
| 1435335_a_at | 432486 |               | 256.8±21.2    | 1463.3±11.5    | 1202.1±21.9    | 547.5±89.3    | 1176.9±21.4    | 846.4±17.3    |
| 1458303_at   | 225743 | Gm96          | 17.7±5.1      | 93.2±29.1      | 84.5±5.7       | 40±4.1        | 81.5±17.5      | 55.3±3.9      |
| 1429581_at   | 229211 | Acad9         | 12.6±0        | 44.9±10.8      | 111.2±11.5     | 41.4±5.7      | 58.3±7.2       | 80.8±18       |
| 1441709_at   |        |               | 12.2±0.6      | 146.5±61.7     | 39.7±0.8       | 40.8±2.6      | 57.1±11.9      | 41.2±8.7      |
| 1415972_at   | 17118  | Marcks        | 7.1±0.7       | 23±2.9         | 58.4±13.6      | 7.5±0.5       | 33.6±0.9       | 65.5±1.3      |
| 1434691_at   | 72193  | Sfrs2ip       | 11.5±0.1      | 45±15          | 101.9±18       | 10.2±1.3      | 54.8±4.5       | 103.3±12.9    |
| 1448880_at   | 22195  | Ube2l3        | 55.7±1        | 269.5±7.7      | 229±42.2       | 110.8±35.5    | 264.8±18.3     | 355.4±50.7    |
| 1429771_at   | 73201  | 3110073H01Rik | 67.2±18.4     | 395.7±77       | 398.1±33.2     | 144.7±30.4    | 322.1±44.2     | 272.7±20.4    |
| 1444726_at   |        |               | 17.8±6        | 77.5±24.3      | 84.9±6.7       | 28.4±8.8      | 87.9±8.1       | 72.7±0.2      |
| 1455789_x_at |        |               | 5436.9±2083.9 | 26759.9±1113.6 | 30644.5±2254.3 | 9926.7±4024.9 | 27496.2±677.3  | 25353.8±765.6 |
| 1442062_at   | 319898 | 7120426M23Rik | 6.5±0.5       | 33.8±2         | 50.5±6.1       | 14.4±6.1      | 32.8±0.4       | 62.9±9.6      |
| 1426527_at   | 68276  | Toe1          | 120.5±12.2    | 595.5±10       | 844.4±114.2    | 226.2±61.7    | 663.7±246.5    | 721.2±147.6   |
| 1416505_at   | 15370  | Nr4a1         | 21.5±5.5      | 70.2±8.4       | 101.3±8.9      | 28.5±1.1      | 119±32.3       | 84.5±2.1      |
| 1437215_at   | 214254 | Nudt15        | 11.7±2.5      | 122.1±17.4     | 61±14.2        | 49.1±10.9     | 65.7±8         | 64.5±8.3      |
| 1451228_a_at | 68416  | Sycn          | 10.8±0.7      | 112±26.4       | 74.3±13.2      | 40±13.5       | 60.6±4.8       | 188.2±21.6    |
| 1451046_at   | 22761  | Zfpm1         | 15.9±1.3      | 50.6±8.5       | 62±8.1         | 13.7±2.4      | 90.1±22        | 49.3±10       |
| 1453016_at   | 72938  | 2900042B11Rik | 28±4.5        | 152.5±15       | 196.9±58.6     | 65.9±22.3     | 159.1±7.3      | 296.2±50.9    |
| 1420504_at   | 56774  | Slc6a14       | 20.2±1.2      | 74.3±34.2      | 161.2±11.9     | 16.1±2.3      | 115.4±9.1      | 350.5±112.6   |
| 1437181_at   |        |               | 7.2±0.3       | 41.6±16.4      | 64.7±9.5       | 12.3±6.9      | 41.2±0         | 57.6±9.7      |
| 1451626_x_at |        |               | 261.1±33      | 1657.4±111.5   | 1952.3±533.1   | 464.7±140.9   | 1502.3±112.2   | 834.9±62.9    |
| 1426548_a_at | 66632  | Atpbd4        | 18.6±5.5      | 73.5±11.4      | 118.4±43       | 14.8±6.4      | 107±37.8       | 110.7±4.8     |
| 1448270_at   | 56200  | Ddx21         | 149.6±42.5    | 1258.8±20.1    | 1073.7±287.5   | 568.4±96.1    | 864.9±53.6     | 606.8±4.5     |
| 1454816_at   | 19889  | Rp2h          | 18.8±2.4      | 81.4±10.8      | 177.2±43.3     | 20.5±3.6      | 109.7±8.1      | 131.8±39.9    |
| 1420907_at   | 12488  | Cd2ap         | 139.4±15.6    | 534.6±24.6     | 1337.9±408.9   | 206±59.5      | 815±2.8        | 1651.7±21.4   |
| 1417914_at   | 74012  | Rap2b         | 45.9±3.2      | 138.6±39.2     | 250.2±14.9     | 55.8±7.9      | 269.7±69.4     | 317.5±66.9    |
| 1457026_at   | 239759 | Liph          | 7.6±0.8       | 37.5±2.2       | 38.8±2.3       | 18.6±5.3      | 45±5.5         | 53.4±14       |
| 1434513_at   | 224088 | Atp13a3       | 354.5±87.3    | 1967±162.1     | 2821.9±359.6   | 947.7±112.5   | 2122.4±291.8   | 2067.9±60     |
| 1438695_at   |        |               | 12.3±1        | 38±13.2        | 148.7±10.1     | 11.1±2.9      | 74.1±4.2       | 126±36.4      |
| 1433521_at   | 433667 | Ankrd13c      | 123.2±29.8    | 1300.8±2.4     | 889.2±82.4     | 706±79.1      | 743.4±29.6     | 873.4±185.5   |
| 1448829_at   | 67241  | Smc6l1        | 16.9±7.1      | 160.7±41.3     | 104.6±2.8      | 23.8±13.8     | 102.3±37.6     | 135.7±19.9    |
| 1452654_at   |        |               | 8±3.5         | 117.9±4.6      | 70.5±10.1      | 24.2±4.4      | 48.3±1.4       | 71.4±25.6     |
| 1429940_at   | 214498 | Cdc73         | 10.9±4.2      | 65±36.3        | 81.6±6.4       | 9.3±0.3       | 66.1±9.6       | 64.2±24       |
| 1438945_x_at | 14609  | Gja1          | 1118.8±313.6  | 7193.6±693.5   | 7896.6±515.8   | 2873.3±982.2  | 6862.9±295.8   | 4710.5±615.4  |
| 1433503_at   |        |               | 13.1±3.1      | 63.7±3.3       | 159±73.9       | 14.2±3.9      | 82±44.2        | 318.3±0.5     |
| 1456012_x_at |        |               | 982.5±39      | 4432.4±952.6   | 6378.9±124.5   | 2230.1±415.6  | 6146.6±45.2    | 4075.2±176.6  |
| 1416288_at   | 15502  | Dnaja1        | 2315.2±462.5  | 12871±795      | 13749.1±76.5   | 6919.5±293.3  | 14651.9±2390.7 | 8735.1±1453.3 |
| 1422071_at   | 16857  | Lgals6        | 224.7±21.3    | 817±166.3      | 1702.1±795.1   | 136.7±11.5    | 1425.2±268.6   | 2643.1±1016.2 |
| 1438971_x_at |        |               | 85.4±9.9      | 299.5±1.9      | 412.6±98.1     | 136.4±30.6    | 546.8±4.6      | 1014.7±53.7   |
| 1452199_at   | 72649  | 2700094F01Rik | 26.1±2.8      | 161.3±76.8     | 149.3±9.9      | 44±2.8        | 167.4±18.9     | 128.9±22.1    |
| 1424438_a_at | 230514 | Leprot        | 25.3±6.7      | 83.4±14        | 268.8±100.9    | 32.8±0.3      | 162.9±18       | 441.9±81.4    |
| 1417818_at   | 97064  | Wwtr1         | 72.6±30.7     | 564.4±67.4     | 545.1±86.4     | 168±6.7       | 470.8±53.9     | 619.9±129.3   |
| 1417386_at   | 19155  | Npepps        | 13±1.3        | 47.8±11.3      | 88.5±0.5       | 14.9±0        | 86.8±9.4       | 162.4±36.7    |
| 1455173_at   |        |               | 11.7±6.2      | 91.8±7.1       | 118.9±14.9     | 24.5±2.6      | 80.6±7.6       | 113.8±26      |
| 1449108_at   | 14148  | Fdx1          | 667.7±53.8    | 2996.2±147     | 4699.2±923.6   | 1230.4±257.1  | 4617±148.1     | 2024.3±304.1  |

|              |                                                    |               |               |                |                |              |                |               |
|--------------|----------------------------------------------------|---------------|---------------|----------------|----------------|--------------|----------------|---------------|
| 1428585_at   | 109711                                             | Actn1         | 139.5±21.2    | 670.2±55.1     | 807.5±64.4     | 336.5±14.5   | 991.6±48.5     | 926±19.5      |
| 1437290_at   | 242291                                             | Impad1        | 8.8±2.6       | 45.2±0.1       | 91.9±24.9      | 14.5±5.5     | 63.5±14.6      | 94.8±18.7     |
| 1437885_at   | 99324                                              | D030029J20Rik | 8.2±0.8       | 31.8±14.3      | 57.6±17.7      | 9.6±1.2      | 58.9±0.3       | 74.6±28       |
| 1422698_s_at | 16468                                              | Jarid2        | 677.6±152.7   | 4557.6±825.8   | 5571±386.3     | 1823.8±397.7 | 4985.9±259.7   | 7574.7±612.9  |
| 1434170_at   | 245404                                             | Wdr40b        | 18.9±8.9      | 259.1±96.7     | 87.4±7.2       | 64.8±2       | 139.7±16.6     | 63.2±2.8      |
| 1424448_at   | 633467                                             | Trim6         | 33.1±7.6      | 453.9±36.2     | 249.3±47.9     | 166.5±16.1   | 244.6±38.9     | 323.1±60.4    |
| 1456028_x_at |                                                    |               | 30.1±8.3      | 173.3±50.4     | 304.6±33.8     | 53.9±14      | 223.4±55.4     | 324.4±116.8   |
| 1448252_a_at | 55949                                              | Eef1b2        | 2089.7±309.6  | 14760.3±249.9  | 19616.4±1971.9 | 6363.4±176.7 | 15584.1±976.3  | 16074±1887.8  |
| 1458675_at   |                                                    |               | 9.3±0.1       | 140.5±35       | 112.2±51.9     | 19.6±11.7    | 70.1±37.8      | 114.6±5.3     |
| 1449625_at   |                                                    |               | 12.5±1.3      | 177.9±37.7     | 60.4±21.8      | 44.4±5.2     | 94.9±14.6      | 146.9±12      |
| 1443816_s_at |                                                    |               | 11.8±2.3      | 83.9±26.8      | 119.6±26.1     | 13.3±5.2     | 91.3±0.9       | 77.3±10.1     |
| 1456830_at   |                                                    |               | 6.5±0.1       | 65.4±1.7       | 19.5±5.2       | 6.8±0.4      | 50.2±13.4      | 23.2±11.3     |
| 1427541_x_at | 15366                                              | Hmmr          | 11.7±0.2      | 41.2±2.9       | 115.9±33.1     | 24.5±1.4     | 90.8±4.4       | 152.6±9       |
| 1434039_at   |                                                    |               | 39.3±7        | 381±36.9       | 389.1±107.5    | 71.4±9.1     | 304.8±6.6      | 404±23.8      |
| 1426750_at   | 286940                                             | Flnb          | 76.8±28.5     | 395.3±59.9     | 492.4±67.9     | 124.1±36.2   | 608.7±254      | 733.9±154.4   |
| 1455002_at   | 19243                                              | Ptp4a1        | 88.6±20.2     | 566.3±74       | 572.2±12.8     | 201.2±47.6   | 704.4±137.8    | 648.2±65.2    |
| 1427893_a_at | 68603                                              | Pmvk          | 54.1±6        | 230.4±16.3     | 721.3±203.3    | 90.1±8.4     | 432.5±114.6    | 818.9±69.2    |
| 1435627_x_at | 17357                                              | Marcks1       | 50.2±27.2     | 347.6±0        | 370.5±47.8     | 120.9±13.3   | 402.6±37.6     | 465.2±41.3    |
| 1434716_at   | 171283                                             | Havcr1        | 64.2±2.8      | 540±138.1      | 566.3±27.8     | 124.9±89.9   | 517.6±44.7     | 4168.2±737.2  |
| 1424200_s_at | 72124                                              | Seh1l         | 110.2±8.4     | 942.5±137.1    | 900.3±56.8     | 471.4±101.5  | 890.6±7.5      | 794.6±210.4   |
| 1417443_at   | 230579                                             | BC026682      | 32.1±3.9      | 221.9±45.1     | 278.3±52.2     | 57.4±7.2     | 259.9±103.1    | 218.8±43.2    |
| 1438922_x_at | 433326;<br>630624                                  | Slc25a5       | 343.7±47.3    | 2280.3±162.4   | 4017.8±250.1   | 714.8±36     | 2793.7±499.3   | 3119.3±620.8  |
| 1433831_at   | 75763                                              | 4833418A01Rik | 9.5±1.1       | 74.9±13.9      | 82.5±0.4       | 39.5±11.2    | 77.7±5.4       | 75.8±8        |
| 1441376_at   | 93739                                              | Gabarapl2     | 16.2±5.8      | 150.5±69.8     | 155.7±40.1     | 27.1±16.8    | 134.5±22.5     | 136.5±6.6     |
| 1434418_at   |                                                    |               | 33.3±8.8      | 135±25.8       | 250.7±26.3     | 23.4±5.7     | 276.3±27.9     | 288.7±15.3    |
| 1420622_a_at | 15481                                              | Hspa8         | 1409.2±1093.9 | 10564.6±2140.9 | 13369.2±4193.2 | 1706.3±69.8  | 11750.4±1766.7 | 9828.7±1982.5 |
| 1428136_at   | 20377                                              | Sfrp1         | 15.1±4.2      | 319.2±49.8     | 102.5±20.6     | 75.8±14.1    | 126.1±2.6      | 48.9±3.7      |
| 1438021_at   |                                                    |               | 32±2.7        | 234.6±94.8     | 305.3±52.2     | 90.6±0       | 275.1±12.6     | 257.9±77.6    |
| 1433624_at   | 227723                                             | 5830434P21Rik | 14.9±4.1      | 65.6±22.5      | 142.3±33.1     | 23.7±4.6     | 128.2±15.1     | 243.7±14.3    |
| 1426649_at   | 230157                                             | Tmeff1        | 10.7±1.4      | 63.9±17        | 102.2±29.8     | 21.8±3.1     | 91.8±21.4      | 61.7±0.8      |
| 1431012_a_at | 23986                                              | Peci          | 21.6±5.2      | 138.7±5.1      | 246.4±87.5     | 34.3±10.1    | 187.4±30.6     | 387.9±68.5    |
| 1428323_at   | 14571                                              | Gpd2          | 57.7±21.2     | 884.1±17.1     | 615.3±131.1    | 289.1±100.3  | 503.6±1.3      | 721.4±2.1     |
| 1438546_x_at | 433326;<br>433923;<br>623402;<br>630624;<br>633283 | Slc25a5       | 85.4±9.3      | 592.8±115.2    | 1060.9±170.6   | 165.1±20.9   | 758.5±114.5    | 1038.5±89.2   |
| 1438360_x_at | 433326;<br>630624                                  | Slc25a5       | 583.6±47.4    | 3920.2±552.5   | 7235.1±736.5   | 1042.1±127.3 | 5207.7±922.9   | 6023.9±1353.5 |
| 1448469_at   | 630776                                             | Nid1          | 9.8±1.7       | 137.8±3.5      | 75.8±20.2      | 34.6±13      | 87.8±30.3      | 72.4±0.3      |
| 1415800_at   | 14609                                              | Gja1          | 671±183.6     | 5919.9±485.3   | 7425.5±52.2    | 2218.9±1036  | 6032.3±195.8   | 3885.3±369.6  |
| 1419571_at   | 114304                                             | Slc28a3       | 9.8±3.1       | 54.8±3.9       | 115.4±7.4      | 20±5.6       | 88.5±23.3      | 376.2±91.4    |
| 1423723_s_at | 230908                                             | Tardbp        | 344.4±6.8     | 4728.1±453.2   | 3831.5±1389.2  | 1902.5±177   | 3135.9±802.9   | 3060.5±162.4  |
| 1443624_at   |                                                    |               | 7.3±0.1       | 65.1±4         | 90±45.7        | 14.9±2.6     | 66.7±5.6       | 140.2±23      |
| 1428752_at   | 233836                                             | Slc5a11       | 22.5±2.6      | 138.6±92.1     | 195.2±13.6     | 20±3.5       | 205.8±79.7     | 116.8±10.5    |

|              |                               |               |              |              |                |              |              |                |
|--------------|-------------------------------|---------------|--------------|--------------|----------------|--------------|--------------|----------------|
| 1426682_at   | 104625                        | Cnot6         | 79.5±24.7    | 841.9±158.1  | 856.8±116      | 345.2±33     | 736.6±35.4   | 574.8±2.8      |
| 1452123_s_at | 232288                        | Frmd4b        | 31.4±7.5     | 166±82.4     | 953.2±352      | 27.5±11.7    | 294.5±103.6  | 1284.4±145.2   |
| 1435777_at   |                               |               | 8±1.6        | 28.8±4.9     | 164.5±8.8      | 34.9±9.7     | 75.5±2.4     | 218.6±29.8     |
| 1455134_at   |                               |               | 8.2±0.6      | 85±4.7       | 120.9±11.3     | 29.2±3.7     | 77.8±5.2     | 169.3±32.3     |
| 1428823_at   | 69692                         | Hddc2         | 13.1±0.4     | 78.7±0.9     | 138.6±12.4     | 35.5±4.8     | 125±32.4     | 202±36.1       |
| 1426441_at   | 18174                         | Slc11a2       | 14.3±1.1     | 285.8±19.2   | 76.6±17.6      | 56.8±11.9    | 137.2±29.1   | 84.5±15.1      |
| 1455223_at   | 140486                        | Igf2bp1       | 17.6±5.9     | 98.1±27.8    | 203.4±43.6     | 25.6±10.6    | 171.1±46.9   | 316.7±5.7      |
| 1449288_at   | 14562                         | Gdf3          | 17±3.2       | 118.1±57.5   | 153±28.7       | 10.7±1.5     | 166±90.7     | 114±16.7       |
| 1418479_at   | 245944                        | Vps54         | 58.9±7.2     | 356.5±38.1   | 891.2±122.4    | 109.2±20.1   | 574.5±60.6   | 949.5±119.6    |
| 1440220_at   |                               |               | 14.3±0.2     | 132.6±16.3   | 101.7±42.1     | 48.8±11.7    | 140.8±15.2   | 136.9±4.9      |
| 1450989_at   | 21667                         | TdGF1         | 29±18.8      | 873.8±64.2   | 383.6±80.3     | 177±94.5     | 287.9±40.4   | 1135.7±332.4   |
| 1427564_at   | 54004                         | Diap2         | 8±2.5        | 169.4±82.6   | 112.8±31.4     | 8.3±2.9      | 79.4±3.7     | 74.1±25.1      |
| 1451468_s_at | 72322                         | Xpo5          | 9.6±1.7      | 69.4±2.8     | 111.7±10.1     | 31.8±2.9     | 96.6±7.2     | 66.5±0.6       |
| 1416041_at   | 20393                         | Sgk           | 406.9±66     | 6795±32.7    | 4486.7±1255.3  | 2872±893.8   | 4089.2±590.2 | 5194.8±880.3   |
| 1435450_at   | 70568                         | Cpne3         | 24±5.7       | 351.7±50.1   | 335±23.5       | 123.5±32.6   | 242.4±7.7    | 774.2±194.7    |
| 1416630_at   | 15903                         | Id3           | 10.5±2.7     | 312.4±152.8  | 51.8±1.1       | 35.5±2       | 105.8±51.7   | 75±9.8         |
| 1435415_x_at | 17357                         | Marcks1       | 34.4±7.2     | 224.3±7.4    | 293.4±7.4      | 90.2±7.2     | 347.3±9.9    | 365.7±90.9     |
| 1449052_a_at | 13436                         | Dnmt3b        | 204.6±48.9   | 1533±126.9   | 2015.5±137.8   | 456.6±32.3   | 2088.1±405.9 | 3277.5±216.1   |
| 1452740_at   | 77579                         | Myh10         | 514.6±32.1   | 2159.1±528.8 | 6725.2±2071.6  | 740.7±1.9    | 5286.8±219.9 | 14976.7±1076.8 |
| 1435104_at   | 100255                        | D130004H04Rik | 6.6±0.6      | 45.5±15.6    | 80.9±17.5      | 9.9±5.3      | 68±1.8       | 131.2±4.2      |
| 1436971_x_at | 22631                         | Ywhaz         | 381.6±135.8  | 2284.9±209.7 | 5320.3±891.6   | 935.3±69.9   | 3946.5±336.2 | 5022.8±74.1    |
| 1448299_at   | 20510                         | Slc1a1        | 76.8±14      | 721.3±55.9   | 710.2±37.1     | 284.3±0.8    | 807.5±5.4    | 534.5±88.5     |
| 1425332_at   | 20402                         | Zfp106        | 85.1±29      | 1165.3±163.9 | 1260.8±164     | 483.1±125.2  | 897.9±51.6   | 1592.7±182.3   |
| 1450853_at   | 21888                         | Tle4          | 194.2±31.2   | 3634±84.6    | 2059.8±19.3    | 1670±148.8   | 2050.8±214.8 | 1957.9±83.1    |
| 1418417_at   | 17681                         | Msc           | 9.5±0.8      | 76.1±36.3    | 157±10.2       | 21.5±1.1     | 100.9±34.5   | 92.3±16.1      |
| 1444456_at   |                               |               | 6.9±0.7      | 66.7±17.5    | 57.4±4.7       | 22±6         | 72.9±8.9     | 83.7±0.2       |
| 1435374_at   |                               |               | 8.1±3        | 87.6±70.9    | 229±12.4       | 9.2±0.2      | 86.4±23.9    | 214.9±90.1     |
| 1422851_at   | 15364                         | Hmga2         | 182.2±42     | 2449±145.4   | 2525.8±473.2   | 490.6±108.6  | 1976.3±47.2  | 1872.7±113.9   |
| 1437338_x_at | 74195                         | Elp3          | 8±0.6        | 76.2±17.6    | 95±16.4        | 32.1±9.6     | 87.3±9.2     | 70.1±13        |
| 1421849_at   | 20843                         | Stag2         | 204.2±3.5    | 3494.7±183.7 | 2394±643.7     | 1343.4±151.1 | 2224.2±50.6  | 1514.8±20.1    |
| 1419351_a_at | 67669                         | O610007P06Rik | 149.8±4      | 934.8±121.8  | 2046.7±154.7   | 477.7±70.5   | 1665.6±384.8 | 1699.7±271     |
| 1450780_s_at | 15364                         | Hmga2         | 79.7±0.7     | 1219.7±54.7  | 1191.8±208.1   | 284±87.7     | 886.5±136.6  | 817.2±0.2      |
| 1429488_at   | 68268                         | Zdhhc21       | 7.5±0.6      | 41.7±4.6     | 140.9±3.7      | 8.3±0.3      | 84.2±2.4     | 204.9±19.2     |
| 1448573_a_at | 26366                         | Ceacam10      | 24±2         | 96.1±14.4    | 371.8±61.8     | 11.3±3.2     | 269.2±21.9   | 263.2±64.9     |
| 1418351_a_at | 13436                         | Dnmt3b        | 32±7.6       | 294.5±45     | 391.6±56.7     | 64.4±6.9     | 361.7±46.7   | 552.3±79.9     |
| 1429556_at   | 269987                        | 2610024B07Rik | 17.5±9       | 273.2±10.7   | 264.1±10.4     | 100.1±18.7   | 200.4±8.1    | 303±36.3       |
| 1418703_at   | 56878                         | Rbms1         | 5.7±3        | 60±5.7       | 121.7±2.2      | 10.6±1.3     | 65.1±21.4    | 299.8±16.1     |
| 1441751_at   |                               |               | 7.1±0.7      | 86±22.6      | 97±21.8        | 5.9±1        | 81.2±18.3    | 81.2±2.8       |
| 1420623_x_at | 15481                         | Hspa8         | 1168.3±636.7 | 12108.9±2110 | 13921.6±1994.7 | 2294.9±133   | 13729.5±3146 | 11623.7±2468.3 |
| 1455819_at   |                               |               | 58.6±19.4    | 455.5±115.5  | 683±53.5       | 141±41.2     | 694.5±192.3  | 1286±164.1     |
| 1437185_s_at | 19240                         | Tmsb10        | 1286.2±509.5 | 7714.5±406.4 | 14272.6±189    | 2504.8±788.1 | 15326.8±931  | 23782.1±593.5  |
| 1428670_at   | 72520                         | 2610305J24Rik | 20±2.1       | 192.4±13     | 192.5±38.3     | 39.4±15.7    | 244.4±44.8   | 226.6±64.4     |
| 1438545_at   | 433326;<br>433923;<br>623402; | Slc25a5       | 32.7±1       | 350±83.1     | 613.1±65.9     | 62.7±30.2    | 407.5±114.3  | 554.6±64.6     |

|                                     |                   |               |              |              |                |              |                |                |
|-------------------------------------|-------------------|---------------|--------------|--------------|----------------|--------------|----------------|----------------|
|                                     | 630624;<br>633283 |               |              |              |                |              |                |                |
| 1419821_s_at                        | 15926             | Idh1          | 18.1±1.3     | 211.8±28.9   | 308.2±21.2     | 44.1±21.8    | 227.3±13.8     | 397.9±108.3    |
| 1448261_at                          | 12550             | Cdh1          | 172.7±65     | 1701.6±147.4 | 2614.1±395.4   | 588.7±129.1  | 2179.1±195.2   | 3433.6±488.5   |
| 1435223_at                          | 244373            | Spfh2         | 13.8±2.3     | 124.4±6.1    | 271.2±11.4     | 66.4±21.6    | 174.5±0.1      | 245.3±27       |
| 1454899_at                          | 210126            | Lpp           | 6.9±0        | 24.1±9.4     | 118.8±8.4      | 8.9±0.2      | 87.2±9.4       | 187.7±16.3     |
| AFFX-b-<br>ActinMur/M124<br>81_3_at |                   |               | 1230.1±238.4 | 9088.9±230.5 | 18019.7±2693.3 | 4214.3±880.9 | 15707.3±1592.3 | 25026.1±1407.4 |
| 1433683_at                          | 77411             | Rbm35b        | 46.6±17.3    | 1050.6±128.5 | 585.9±88.9     | 365.7±45.2   | 600±46.2       | 616.4±82.7     |
| 1434548_at                          | 26943             | Serinc3       | 24±1         | 262.3±0.9    | 195.9±13.5     | 81.2±18.7    | 312.2±100.1    | 193.9±19       |
| 1422697_s_at                        | 16468             | Jarid2        | 288.4±177.7  | 3562.2±37.5  | 4564.8±61      | 1134.3±128.6 | 3757.1±142.9   | 6173.4±484.2   |
| 1418538_at                          | 105785            | Kdelr3        | 11±0.7       | 104.1±25.7   | 119.1±17.4     | 23.7±2.4     | 144.2±82.8     | 106.7±42.8     |
| 1426566_s_at                        | 57890             | Il17re        | 16.3±2.9     | 94.6±23.6    | 148.8±24       | 21.7±9.7     | 214.2±61.4     | 383.7±116.4    |
| 1434803_a_at                        | 68416             | Sycn          | 17.8±6.7     | 483.7±38.5   | 285.3±19.2     | 148±72.8     | 235.7±56.5     | 609.6±121.9    |
| 1426402_at                          | 56403             | Syncrip       | 62.6±30.5    | 1299.4±69.9  | 898.9±185      | 420.9±148.2  | 855.6±74.4     | 557.9±44.8     |
| 1455294_at                          |                   |               | 79.8±13.9    | 1216.4±23.7  | 1365.7±205.3   | 565.7±2.2    | 1092.7±195.3   | 578.4±96.1     |
| 1420913_at                          | 24059             | Slco2a1       | 24±7.1       | 168.9±94.8   | 319.9±64.1     | 24±2.3       | 329.5±43.7     | 256.1±38       |
| 1428339_at                          | 68219             | Nudt21        | 11.3±5.4     | 99.9±29.9    | 122.4±20       | 16.6±7.7     | 156.1±12.1     | 185.7±49.2     |
| 1450781_at                          | 15364             | Hmga2         | 187.7±18.6   | 4008.5±322.7 | 3289.2±684.2   | 869.8±19.8   | 2617.8±184.8   | 2096.1±32.1    |
| 1424650_at                          | 72599             | Pdia5         | 103.7±21.3   | 1056±98.3    | 1575.6±5.9     | 267±32.6     | 1451.5±56.5    | 1329.8±101.2   |
| 1436194_at                          | 77619             | C330008K14Rik | 86.1±10.2    | 613.1±174.1  | 1530.4±292.5   | 216.7±55.1   | 1210.1±267.5   | 298±15.2       |
| 1449576_at                          | 66235             | Eif1ay        | 7.1±1.4      | 175.5±17.4   | 101.8±17.2     | 73.3±27.9    | 99.4±26.8      | 69.9±1.6       |
| 1417143_at                          | 14745             | Edg2          | 6.7±1.3      | 205.9±49.1   | 84.7±14.6      | 54±23        | 95.5±22.3      | 91.8±9.5       |
| 1445007_at                          |                   |               | 22.2±1.6     | 842.1±33.7   | 322.7±28.3     | 188.3±52.3   | 315.9±22.2     | 181.8±48.1     |
| 1417227_at                          | 72039             | Mccc1         | 20.7±3.8     | 190.8±34     | 284.9±56.2     | 91.1±10.5    | 295.1±62.3     | 474.7±21.9     |
| 1455314_at                          | 210126            | Lpp           | 10.6±3.9     | 58.7±5.2     | 281.2±49.3     | 9.4±1.3      | 152.9±5.1      | 577.2±43.6     |
| 1422567_at                          | 63913             | Niban         | 28±3.6       | 155.2±36.7   | 793.2±58.3     | 16.1±13.1    | 412.2±79.6     | 1450±340.7     |
| 1422433_s_at                        | 15926             | Idh1          | 79.3±28      | 1143.4±80.7  | 1362.8±15.2    | 232.8±154    | 1170.5±27.6    | 2478±468       |
| 1423796_at                          | 71514             | Sfpq          | 90.9±14.7    | 1281.6±480.1 | 1004.6±178     | 240±94.1     | 1348.1±365.2   | 780.7±363.2    |
| 1435397_at                          |                   |               | 54.8±2.7     | 1209.4±18.1  | 1037.3±117.2   | 265.5±24.8   | 812.4±150.5    | 857.7±82.9     |
| 1456319_at                          |                   |               | 106.9±22.6   | 1320.7±4.7   | 1544.7±243.9   | 177.3±70.7   | 1599.4±97      | 1806.7±950.9   |
| 1423596_at                          | 59126             | Nek6          | 7.2±0.2      | 31.1±0.8     | 226.8±62.1     | 10.3±4.4     | 107.7±10.1     | 218.2±26.5     |
| 1456795_at                          | 399584            | D330027G24Rik | 11.9±2.6     | 168.4±5.8    | 284.4±81.6     | 51±19.8      | 181.2±53.5     | 883.2±217.6    |
| 1421840_at                          | 11303             | Abca1         | 10.5±4.2     | 112.8±23.6   | 176±69.7       | 27.4±9.9     | 162.1±48       | 148.2±21.4     |
| 1423960_at                          | 14792             | Grcc3f        | 74.2±9.2     | 748.7±169.5  | 1323.8±194.9   | 230.3±37.9   | 1164±59.6      | 1183.3±102     |
| 1426802_at                          | 20362             | Sept8         | 9.6±3        | 59.8±11.4    | 130.1±1.4      | 20.7±5.6     | 154.8±38.7     | 93.1±27.6      |
| 1460541_at                          | 330836            | Slc7a6        | 11.9±5       | 159±22.5     | 271±9.8        | 38.7±8.6     | 192.7±78.4     | 492.8±67.4     |
| 1433519_at                          | 98415             | Nucks1        | 321.2±57.5   | 4970±263.9   | 7690±889.2     | 2185±502.8   | 5208.1±343.2   | 7991.1±1255.9  |
| 1436762_x_at                        | 74195             | Elp3          | 33.4±2.9     | 410.5±31.1   | 656.4±55.6     | 184.2±41     | 561.6±70.7     | 420.4±15.7     |
| 1418635_at                          | 27049             | Etv3          | 4.4±0.1      | 123.5±11.6   | 119.5±42.9     | 38.2±16.8    | 74.8±3.7       | 175.5±10.6     |
| 1436181_at                          | 16413             | Itgb1bp1      | 4.8±0.5      | 61.4±6.5     | 96.5±1.7       | 26.4±3.2     | 82.7±27.1      | 107.4±16.8     |
| 1452387_a_at                        | 56332             | Amotl2        | 17.8±0.3     | 462.8±73.9   | 239.9±21.8     | 156.4±72.8   | 308.5±94       | 460.2±118      |
| 1418637_at                          | 27049             | Etv3          | 13.6±1.7     | 285.7±25.4   | 370.5±7.7      | 99.9±2       | 236.5±27.7     | 441.8±45.1     |
| 1436902_x_at                        | 19240             | Tmsb10        | 188.8±83.3   | 1307±111.5   | 2964.2±484.4   | 305.6±48.5   | 3332.2±725.1   | 8375.4±1684.9  |

|              |        |               |            |              |              |              |              |              |
|--------------|--------|---------------|------------|--------------|--------------|--------------|--------------|--------------|
| 1441682_s_at | 73192  | Xpot          | 175.8±50.4 | 3082.9±508.1 | 3148.2±667.3 | 1019.8±430.3 | 3171±90.3    | 2447.5±342.3 |
| 1460330_at   | 11745  | Anxa3         | 7.4±1.8    | 85.5±8.1     | 139.6±46.7   | 23.8±7.6     | 135.6±26.3   | 929.9±318.9  |
| 1423829_at   | 223601 | 0910001A06Rik | 31.5±5     | 389.7±27.2   | 997±33       | 132.4±17.8   | 576±139.4    | 790.4±101.3  |
| 1417673_at   | 50915  | Grb14         | 10.1±1     | 146.5±53.6   | 189±50.9     | 57.5±3.4     | 186.1±6.3    | 150.5±31.6   |
| 1417769_at   | 67089  | Psmc6         | 8.4±0.1    | 136.7±22.9   | 219.6±26.2   | 50.3±6.2     | 156.7±54.8   | 152.9±13.1   |
| 1456700_x_at |        |               | 12.9±8     | 141.4±50.8   | 483.9±120.3  | 17.7±1.2     | 244.7±60.2   | 1044.5±463.5 |
| 1435787_at   | 242083 | Ppm1l         | 18.1±1.4   | 525±28.3     | 204.4±74.6   | 200.3±4.7    | 348.1±23.6   | 177.8±17.2   |
| 1434642_at   | 114664 | Dhrs8         | 7±0.1      | 116.8±9.7    | 104±9.3      | 33.4±23      | 135.7±22.4   | 226.2±16.8   |
| 1437226_x_at | 17357  | Marcks1       | 149.4±33.3 | 2095.9±888.3 | 2695.7±252   | 433.2±65.9   | 2924.9±455.7 | 3659±497     |
| 1442003_at   |        |               | 7.4±0.5    | 214.4±0.5    | 156.7±2.6    | 11.3±9.5     | 145.8±57.7   | 143.1±24.1   |
| 1456309_x_at |        |               | 28.5±14.7  | 523.2±0.3    | 374.9±0.3    | 56.5±23.6    | 575.9±88.4   | 699.1±103    |
| 1455680_at   | 319878 | 9630025H16Rik | 13.6±11.7  | 219.3±6.3    | 503.7±40.6   | 33.2±4.9     | 275.4±26.4   | 497.2±122.3  |
| 1438169_a_at | 232288 | Frm4b         | 48.9±18.4  | 489.8±163.1  | 1979±507.5   | 38.3±34.5    | 1013.6±322.2 | 2618.7±264.7 |
| 1424246_a_at | 21753  | Tes           | 5.4±2.3    | 86.1±18.8    | 249±71.4     | 10.3±4.8     | 112.4±13     | 495.5±77.6   |
| 1436519_a_at | 68832  | 1110057K04Rik | 18±4.6     | 374.9±34.3   | 601.8±19.1   | 147.4±9.3    | 376.9±81.8   | 354.9±31.3   |
| 1434839_s_at | 81004  | Tbl1xr1       | 39.4±7.7   | 539.4±79.1   | 877.6±86.1   | 145±9.7      | 827.5±176.7  | 1139.5±41.4  |
| 1433754_at   | 105559 | Mbnl2         | 9.3±0.3    | 105±10.4     | 251.6±36.7   | 18.1±14.8    | 195.8±8.9    | 341.6±33.6   |
| 1455437_at   | 109199 | 9030204A07Rik | 10.6±4.4   | 373.5±38.9   | 287.3±33.9   | 85.8±18.9    | 225.9±31.9   | 252.1±63.6   |
| 1449095_at   | 245944 | Vps54         | 12.6±0.4   | 244.2±23.4   | 441±52.3     | 90.9±19.5    | 273.4±31.8   | 832.4±138.2  |
| 1449210_at   | 140486 | Igf2bp1       | 21.8±0.4   | 379.4±69.6   | 480.7±49.7   | 173.4±52.6   | 490.5±33.3   | 284.2±21     |
| 1455011_at   | 170459 | Stard4        | 6.9±0.5    | 174.5±2.9    | 146.7±1.5    | 18.5±0.1     | 164.9±4.6    | 322.8±65.6   |
| 1428772_at   | 73192  | Xpot          | 55.6±18.5  | 1394.3±115.1 | 1465.7±294.4 | 390.4±176.7  | 1329.5±68    | 1078.6±226.2 |
| 1421830_at   | 11639  | Ak3l1         | 83.9±16.4  | 1454.5±216.6 | 2811.3±520.3 | 489.4±105.5  | 2021.5±191.4 | 2385±222.6   |
| 1449128_at   | 52715  | Ccdc43        | 15.1±0.9   | 341.1±27     | 534.9±76.6   | 95.4±0.3     | 368.5±83.7   | 156.3±30.6   |
| 1449011_at   | 20499  | Slc12a7       | 6.3±0.6    | 49.3±15.9    | 103.3±32.3   | 17.3±0.2     | 156.9±8.3    | 59.8±11.4    |
| 1450387_s_at | 11639  | Ak3l1         | 174.2±26.6 | 3184.7±148.1 | 5193.5±105.3 | 1551.4±155.9 | 4361.5±360.2 | 4489.5±6.3   |
| 1426195_a_at | 13010  | Cst3          | 32.7±9.6   | 492±136.2    | 756.6±24.5   | 233.4±6.1    | 820.1±32.8   | 1014.2±106   |
| 1455300_at   |        |               | 13.5±4.9   | 132.1±8.3    | 335.1±91.6   | 37.4±8.4     | 342.6±132.1  | 345.4±127.7  |
| 1416675_s_at | 18799  | Plcd1         | 12.7±0.9   | 538.3±54.3   | 341.4±11.1   | 163±12.6     | 331.8±9.5    | 805.8±52.5   |
| 1434897_a_at |        |               | 216.7±33.7 | 5186.8±304.5 | 7744.8±433.8 | 2012.4±45.8  | 5715.1±670.5 | 6021.3±850.3 |
| 1450700_at   | 260409 | Cdc42ep3      | 11±0.6     | 156.1±1.6    | 299.2±105.5  | 41±26.5      | 294.3±20     | 212.1±1.1    |
| 1428829_at   | 75743  | 6820401H01Rik | 13.1±5.1   | 206.8±14     | 419.9±58.8   | 10.2±2       | 351.9±27.1   | 482.9±103.7  |
| 1440167_s_at |        |               | 11.7±0.9   | 90.4±3.8     | 392.3±19.9   | 21±6.5       | 329±44.5     | 717.4±56.1   |
| 1451493_at   | 65113  | Ndfip1        | 35.8±3.4   | 334.6±71.4   | 1353.8±272.4 | 154.7±12     | 1023.8±55.2  | 1746.8±420.4 |
| 1434162_at   |        |               | 21±2.2     | 614.9±47.7   | 545.7±63.2   | 226.1±19.7   | 613.4±92.9   | 510.3±17.9   |
| 1417957_a_at | 66805  | Tspan1        | 10.5±4.1   | 697.6±190.1  | 312.8±118    | 35.4±33.2    | 319.4±122.8  | 159±0.9      |
| 1455827_at   | 105559 | Mbnl2         | 6.9±0.7    | 77.6±16.8    | 263.4±169.3  | 7.7±0.1      | 220.8±36.9   | 420±15.3     |
| 1426248_at   | 223255 | Stk24         | 22.2±8.2   | 517.6±37.4   | 1087.5±315.4 | 147.7±62.4   | 730.3±30.8   | 1499.9±133.2 |
| 1426697_a_at | 16976  | Lrpap1        | 72.2±23.7  | 3197±423.8   | 1354.5±139.9 | 809.1±24.3   | 2434.6±23.2  | 2045.6±328.1 |
| 1448432_at   | 18799  | Plcd1         | 3.6±0.2    | 201.8±95.8   | 118.5±38.4   | 60.2±8.6     | 122.5±27.3   | 317.7±49.5   |
| 1460173_at   | 16796  | Lasp1         | 13.9±0.6   | 431.7±144.3  | 312.7±75.6   | 22.6±2.6     | 473±199.8    | 611.8±277.4  |
| 1451594_s_at | 97848  | Serp1b6c      | 12±4       | 61.3±14.8    | 674.1±154.7  | 17.7±6.1     | 416±62.7     | 1330.3±178.9 |
| 1449888_at   | 13819  | Epas1         | 36.3±7.6   | 515±102.3    | 897.7±10.8   | 169.3±48.5   | 1295.8±155.8 | 324.3±56.6   |
| 1437289_at   | 242291 | Impad1        | 8±0.9      | 122±57.1     | 399.1±56.3   | 31±4.6       | 288±25.1     | 390.7±26     |
| 1429240_at   | 170459 | Stard4        | 8.7±3      | 302.7±21.3   | 266.5±50.4   | 36±8.6       | 318.8±6.6    | 576.5±153.7  |

|              |        |               |            |               |               |              |               |               |
|--------------|--------|---------------|------------|---------------|---------------|--------------|---------------|---------------|
| 1436340_at   | 100223 | 9630041G16Rik | 6.5±0.8    | 151.5±46.9    | 294.5±17.9    | 49.9±14.9    | 239.6±15.1    | 277.4±68.7    |
| 1438512_at   |        |               | 10.7±3.5   | 146.4±47.2    | 313.4±32      | 34.6±13.4    | 404.6±79.7    | 280.3±74      |
| 1436609_a_at | 16976  | Lrpap1        | 363.3±1    | 9472.6±415    | 15171.7±894.8 | 3397.6±669.3 | 13762.4±2.8   | 16668.3±806.8 |
| 1439264_x_at | 16796  | Lasp1         | 116.3±68.2 | 5170.8±673    | 4526.2±325.2  | 923.5±95.9   | 4540±29.3     | 5377.5±282.2  |
| 1436317_at   | 241062 | D230012E17Rik | 7.9±0.3    | 39.3±3.8      | 426.5±126     | 13.5±1.1     | 314.2±0.9     | 301.7±20.2    |
| 1427133_s_at | 14725  | Lrp2          | 10.4±0.5   | 35.3±0.9      | 812.6±399     | 12.9±2.1     | 418.6±57.9    | 2384.1±26.5   |
| 1417089_a_at | 12716  | Ckmt1         | 11.3±2.3   | 609.4±293.7   | 421.9±109.4   | 69.2±17.6    | 474.7±104.6   | 764.2±220.1   |
| 1438633_x_at | 16796  | Lasp1         | 95.8±68.4  | 4759.2±277.6  | 4448.7±474.6  | 657.8±117    | 4301.7±105.5  | 5525.1±534.6  |
| 1438223_at   | 245944 | Vps54         | 42.7±7.2   | 1891.3±141.8  | 2860±273.8    | 404.3±241.8  | 1974.3±146.5  | 2557±39       |
| 1454709_at   | 100201 | Tmem64        | 36±13.2    | 2529.4±53     | 1628.8±451.2  | 731.1±228.7  | 1730.2±201.7  | 1002.9±104.5  |
| 1452973_at   | 243382 | Ppm1k         | 4.4±1.4    | 261.6±8.3     | 224.4±84.5    | 46.8±18.2    | 210.8±49.4    | 148.1±3.1     |
| 1456036_x_at |        |               | 100.2±7.6  | 4451.3±34.8   | 5314.5±464    | 920.5±532.2  | 4827.8±596    | 4645.1±582.5  |
| 1417125_at   | 269378 | Ahcy          | 19.9±9.1   | 405.9±46      | 1592.4±247.3  | 137.9±16     | 999.8±84.4    | 1519.4±118.3  |
| 1439407_x_at | 21346  | Tagln2        | 22.4±2.3   | 371.4±127.7   | 895.6±188.5   | 137.4±6.9    | 1126.9±112    | 2175±59.6     |
| 1452840_at   | 69784  | 1500009L16Rik | 12±0.7     | 342.9±110     | 823±3.3       | 41.6±33.5    | 650.3±153.9   | 418.8±26      |
| 1438634_x_at | 16796  | Lasp1         | 114.7±90   | 6544.5±281.3  | 6197±333.9    | 657.9±203.6  | 6264.5±329.7  | 7760.5±521.8  |
| 1452148_at   | 16976  | Lrpap1        | 26.8±13.7  | 2258.5±144.2  | 924.4±49      | 501.5±13.8   | 1538±167.1    | 1223.3±117.5  |
| 1448265_x_at | 14012  | Eva1          | 7.9±3.6    | 342.7±9.4     | 774±142.7     | 67.8±14      | 457±45        | 854.2±183.5   |
| 1415971_at   | 17118  | Marcks        | 5.2±1.1    | 180.5±5.1     | 561.1±48.5    | 22.7±9.7     | 303.7±57.7    | 858.1±433     |
| 1455470_x_at |        |               | 20.5±9.9   | 1354.9±4      | 1193.5±46.4   | 111.1±43.9   | 1232.5±8.8    | 1605.3±160.6  |
| 1428579_at   | 71409  | Fmn12         | 13.4±0.1   | 153.3±5.3     | 1721.8±449.7  | 35.3±18.2    | 812.8±14.8    | 3629.3±251.1  |
| 1416953_at   | 14219  | Ctgf          | 10.4±5.8   | 1026.9±118.8  | 551±47.7      | 322.2±62.9   | 642±10.2      | 204.1±38.9    |
| 1417311_at   | 68337  | Crip2         | 37.1±11.2  | 878.9±233.3   | 1904.3±524.5  | 154.6±117.3  | 2292.8±785.8  | 2679.4±1038.8 |
| 1417185_at   | 110454 | Ly6a          | 30.8±10.3  | 1524.2±145.5  | 3993.8±61.5   | 308.6±93.5   | 1951.4±192.8  | 3132.2±414.1  |
| 1416808_at   | 18073  | Nid1          | 14.3±5.8   | 1110.4±191    | 834.9±94.2    | 231.5±32.7   | 904.1±49.1    | 755.1±72.2    |
| 1434307_at   | 100201 | Tmem64        | 14.2±5.3   | 1734.8±358.1  | 796.9±281.8   | 556.4±85.1   | 924.8±184.2   | 355.7±25.1    |
| 1418091_at   | 81879  | Tcfcp2l1      | 21.8±12.3  | 765.7±223.7   | 1807.2±331.7  | 82.5±5.9     | 1462.4±61.8   | 1749±256.7    |
| 1453351_at   | 57246  | Tbx20         | 6.3±0.4    | 396.2±23.4    | 703.9±337     | 74.4±9.8     | 422.6±92.9    | 462.9±90.7    |
| 1428283_at   | 74134  | Cyp2s1        | 57.7±11.4  | 2854.1±300.3  | 3181.1±502    | 617.3±171.9  | 3913.2±446.1  | 4360.3±886.3  |
| 1456642_x_at |        |               | 20.1±9.6   | 384.3±88.6    | 1244.3±240.4  | 96.5±25.1    | 1382.6±418.7  | 4048.7±399.4  |
| 1426696_at   | 16976  | Lrpap1        | 90.6±33    | 3688.7±1374.5 | 7394.4±1908.8 | 665.4±83.6   | 6252.3±1369.7 | 8833.8±2493.7 |
| 1448022_at   |        |               | 34.3±6.1   | 2460.8±647.6  | 4764.7±126.2  | 344.1±205.4  | 2465.7±182.6  | 2900.3±81.1   |
| 1448967_at   | 66536  | Nipsnap3a     | 8.4±0.6    | 405.4±9.7     | 694.6±55.6    | 96.2±65.1    | 643.1±200.4   | 914.3±148.3   |
| 1418283_at   | 12740  | Cldn4         | 9±0.2      | 350.3±194.3   | 653.5±202.9   | 42±22.9      | 699.9±401.6   | 1479±628.9    |
| 1422075_at   | 12591  | Cdx2          | 6.5±3.3    | 172.1±46.2    | 810.5±121     | 20.5±1.8     | 591±158.8     | 1143.7±84     |
| 1429388_at   | 71950  | Nanog         | 16.5±2     | 337.8±55.5    | 2194.4±344.7  | 122.8±44     | 1613.2±426.5  | 1063.5±80.4   |
| 1434909_at   | 52187  | Rragd         | 38.9±2.6   | 3295.1±67.8   | 4072.2±596.4  | 794.8±262.7  | 3999.9±2.7    | 3434.6±145.3  |
| 1448987_at   | 11363  | Acadl         | 24.6±7.8   | 3890.3±468.8  | 3356.9±238.9  | 1604.8±289   | 2749.6±527.7  | 4082.1±489.6  |
| 1434369_a_at | 12955  | Cryab         | 11.1±4.6   | 106±61        | 702.7±78.6    | 12.9±2       | 1273.9±352.5  | 1978.2±183.2  |
| 1460351_at   | 20195  | S100a11       | 11.8±7.7   | 388.2±51.9    | 1706±312.8    | 68.1±10.3    | 1445.9±64.6   | 4376.5±14.2   |
| 1423933_a_at | 76509  | 1600029D21Rik | 9.6±4.3    | 188.4±73.7    | 1103.5±460.4  | 14.8±0.9     | 1218.6±570.4  | 1053.1±700.1  |
| 1429377_at   | 66991  | 2410004A20Rik | 37.8±3     | 1998.1±811.4  | 5574.2±372.4  | 491.8±214.2  | 5057.4±770.9  | 6162.5±1252.7 |
| 1416236_a_at | 14012  | Eva1          | 11.3±0.5   | 1338.8±281.3  | 2283.8±291.1  | 354.4±32.8   | 1843.4±38.9   | 3134.2±578    |
| 1416531_at   | 14873  | Gsto1         | 26.9±1.9   | 4185.5±865    | 4966.8±40.5   | 1011.1±161.5 | 5992.7±181.8  | 5867.7±376.8  |
| 1419091_a_at | 12306  | Anxa2         | 9.4±1      | 360.7±10.6    | 1928.1±78.4   | 113.9±66     | 2315.1±199    | 5245.4±181    |

|              |       |         |          |              |                |             |               |                |
|--------------|-------|---------|----------|--------------|----------------|-------------|---------------|----------------|
| 1416635_at   | 57319 | Smpdl3a | 7.1±1.6  | 1515.3±207.1 | 2000.5±93.2    | 383.1±207.5 | 1841.4±161.7  | 2687.2±144.3   |
| 1435436_at   |       |         | 10.9±5.5 | 2031.9±132   | 3177.2±112.2   | 343.9±110.6 | 2880.3±266.9  | 2920.8±193.8   |
| 1448894_at   | 14187 | Akr1b8  | 8.7±5    | 297.4±56     | 3605.5±1744.4  | 13.6±2      | 2518.6±199    | 7769.5±871.1   |
| 1448649_at   | 13809 | Enpep   | 7.7±0.5  | 555.3±320.5  | 4590.9±1128.8  | 63.4±43.4   | 2348.9±1155.9 | 9907.4±1632.9  |
| 1435989_x_at |       |         | 10.5±0.3 | 518.7±198.7  | 5732.6±1940.3  | 55.1±13.7   | 4818.3±74.4   | 10300.6±1681.3 |
| 1420647_a_at | 16691 | Krt2-8  | 11.6±4.3 | 532.7±98.9   | 6803±1912.8    | 61±14.1     | 6460.9±71     | 13413.1±1241.4 |
| 1452320_at   | 14725 | Lrp2    | 7.3±0.6  | 417.8±270.7  | 4968.3±1419.8  | 57.1±11.5   | 4114.3±756.5  | 6091.8±1454.4  |
| 1423691_x_at | 16691 | Krt2-8  | 13±1.6   | 797.5±301.7  | 11355.6±4647.7 | 89.7±46.1   | 9248.9±55     | 22021.2±3423.7 |

**Group 3** 19 genes (19 probe sets)

| Probe set ID | Entrez gene ID | Gene symbol | cont.1.5 (n=2) | cont.2.5 (n=2) | cont.3.5 (n=2) | u2.5 (n=2) | u3.5 (n=2) | u4.5 (n=2)  |
|--------------|----------------|-------------|----------------|----------------|----------------|------------|------------|-------------|
| 1460222_at   | 20401          | Sh3bp1      | 22.9±0.2       | 23.2±0.1       | 69.8±22.9      | 17.7±0.1   | 29.3±6.4   | 159.5±7.8   |
| 1430774_at   |                |             | 6.7±1.9        | 8±3.1          | 21±1.3         | 8±1.1      | 8.2±0.4    | 24.4±5.5    |
| 1434511_at   | 102093         | Phkb        | 32.2±6.6       | 18.5±2.6       | 101.6±27.4     | 10.6±3.4   | 38.1±0.7   | 229.2±53.3  |
| 1446094_at   |                |             | 8.7±0.9        | 17.6±2.9       | 28±2           | 9.9±0.2    | 12.3±2.3   | 42.6±6      |
| 1453377_at   | 72281          | Sh2d4a      | 11.6±0.4       | 12.7±0         | 39.3±12.8      | 10.3±2.9   | 10.2±2.5   | 115.5±44.9  |
| 1424025_at   | 215751         | BC013529    | 20.7±0.2       | 25.1±0         | 72.1±9.9       | 45.6±0.9   | 39.2±8.4   | 86.2±1.7    |
| 1452404_at   |                |             | 8.9±2.1        | 9.1±2          | 31.7±8.6       | 10.6±0.1   | 11.2±1.7   | 35.6±2.3    |
| 1447060_at   |                |             | 21.3±0.6       | 25.6±2.9       | 84.2±6.7       | 17.7±0.5   | 47.9±8.9   | 86.3±13.3   |
| 1436107_at   | 76522          | Lsm8        | 7.3±1.6        | 11.1±3         | 29±13.1        | 7.2±0.1    | 8.1±1.1    | 23.9±5.5    |
| 1449559_at   | 17702          | Msx2        | 4.8±0.1        | 10.1±1.2       | 21.4±4.8       | 5.9±0      | 12.8±1.3   | 52.3±0.6    |
| 1448160_at   | 18826          | Lcp1        | 11±1.4         | 8.1±0.9        | 49.5±18.7      | 8.5±1.9    | 15.8±0     | 523.2±4.3   |
| 1416617_at   | 68738          | Acss1       | 8.9±0.6        | 19.2±3.2       | 44.1±21.4      | 11.1±1     | 7.9±0.6    | 142.6±23.8  |
| 1434889_at   | 233765         | Plekha7     | 6.7±0.1        | 8.5±2.3        | 37.3±10.6      | 10±1.7     | 9.9±4.4    | 89.1±15.1   |
| 1455403_at   |                |             | 7.7±2          | 17.6±1.5       | 43.1±4         | 23.3±0.8   | 17.8±5.5   | 64.2±18.1   |
| 1448406_at   | 58521          | Cri1        | 25.8±2.3       | 59±1.2         | 154.1±4.9      | 86.9±14.3  | 75.2±0.6   | 111.4±11.9  |
| 1416187_s_at | 52830          | Pnrc2       | 100.9±22.7     | 214.1±14.7     | 631.4±66.4     | 454.2±13.5 | 297±48.2   | 768.6±166.2 |
| 1445281_a_at |                |             | 10±0.8         | 16.1±5.2       | 72.7±2         | 19.7±3.3   | 25.4±9.7   | 54.7±4.2    |
| 1426153_a_at | 13511          | Dsg2        | 6.2±1.1        | 8.5±0.6        | 54.9±20.9      | 6.8±0.2    | 18±2.8     | 129.6±14.7  |
| 1436473_at   | 72720          | Zfp248      | 8.1±0.3        | 8.5±0.1        | 101.4±12.2     | 7.9±0.2    | 16.5±10    | 88.9±18.3   |

**Group 4** 43 genes (47 probe sets)

| Probe set ID | Entrez gene ID                          | Gene symbol | cont.1.5 (n=2) | cont.2.5 (n=2) | cont.3.5 (n=2) | u2.5 (n=2) | u3.5 (n=2)   | u4.5 (n=2)  |
|--------------|-----------------------------------------|-------------|----------------|----------------|----------------|------------|--------------|-------------|
| 1426936_at   | 630153;<br>631386;<br>637482;<br>630525 |             | 95.1±26.6      | 371.9±75.8     | 554.6±20.2     | 83.1±57.4  | 749.8±27.1   | 517.5±198.8 |
| 1440555_at   |                                         |             | 4.2±0.4        | 13.6±6.8       | 18.8±4.8       | 3.9±0      | 18.8±0.7     | 19.4±6.4    |
| 1429239_a_at | 170459                                  | Stard4      | 113.6±31.5     | 465.7±65.3     | 461.5±231.1    | 92±56.2    | 810.5±180.1  | 354.1±119.7 |
| 1455241_at   |                                         |             | 13±8.1         | 36.7±6.8       | 102.8±24.2     | 8±2.1      | 145.2±60.6   | 211.7±21.7  |
| 1429116_at   |                                         |             | 40.1±16.7      | 115.8±15.5     | 123.9±28.8     | 35.6±0.5   | 144.6±13.8   | 168±33.9    |
| 1459900_at   |                                         |             | 20.1±5.4       | 57.5±3.2       | 138.1±0.1      | 13.7±0     | 128.2±60.6   | 233.3±15.1  |
| 1419832_s_at | 56318                                   | Acpp        | 26.1±9.4       | 79.8±4.5       | 119.8±9.5      | 21.1±5.1   | 102.7±11.8   | 33.2±18.7   |
| 1444479_at   |                                         |             | 20.9±0.1       | 71.4±31        | 84.3±43.9      | 17±1.3     | 76.8±24.4    | 104.8±4.1   |
| 1420498_a_at | 13132                                   | Dab2        | 345.8±222.7    | 1237.5±292.7   | 3161.4±503.7   | 132.8±83.7 | 3323.8±675.5 | 5090.5±565  |



|              |                   |                     |               |              |              |              |               |               |
|--------------|-------------------|---------------------|---------------|--------------|--------------|--------------|---------------|---------------|
| 1428357_at   | 72148             | 2610019F03Rik       | 424.2±43.8    | 986.9±89.6   | 3328.2±274.2 | 240.6±53.3   | 2933.5±559.3  | 7128.3±525.4  |
| 1454942_at   |                   |                     | 17.9±8.4      | 28.3±4.1     | 203±40.9     | 7.6±2        | 141.4±25.1    | 769.8±157.3   |
| 1430604_a_at | 13132             | Dab2                | 36.5±3.3      | 76.8±0.3     | 245.8±3.8    | 16.8±3       | 226.7±20.2    | 222.4±22.8    |
| 1428822_a_at | 69226             | Snx24               | 11.4±7.7      | 40±8.1       | 39.1±11.1    | 7.9±1.5      | 39±5.1        | 98.4±1.9      |
| 1416763_at   | 98828             | G431001109Rik       | 77.5±10.3     | 92.3±27.8    | 616.3±160.2  | 24.2±1.1     | 487.9±15.8    | 1082.3±44.6   |
| 1428935_at   | 12330             | Canx                | 88.2±7.6      | 228.9±35.9   | 242.4±20.5   | 53.9±4.3     | 350.4±60.5    | 341.8±151     |
| 1419106_at   | 72381             | 2210409E12Rik       | 186.2±23.6    | 333.1±188.5  | 1649.8±687.9 | 37.5±23.9    | 1311.1±549.4  | 643.5±226.1   |
| 1416354_at   | 19655             | RbmX                | 76.7±22.2     | 227.7±26.4   | 190.3±24.3   | 35.2±23.8    | 362.5±22.1    | 76.2±2.7      |
| 1449344_s_at | 72381             | 2210409E12Rik       | 351.4±64.8    | 497.3±158.5  | 2191.5±197.6 | 106.6±68.2   | 1945.5±302.9  | 972.9±6.9     |
| 1435081_at   | 19027             | Sypl                | 29.8±9.5      | 76.3±18.1    | 89.6±12.5    | 20.4±1.2     | 86.2±9.6      | 70.2±16       |
| 1445062_at   |                   |                     | 65.2±19.8     | 186.7±58.8   | 165.5±21.5   | 52.9±9.5     | 138.3±22.8    | 261.2±10.9    |
| 1426981_at   | 18553;<br>631913  | Pcsk6               | 31.8±14.7     | 74.2±15      | 152±24.9     | 21.4±3.4     | 87.5±13.6     | 385.1±99.1    |
| 1434773_a_at | 20525             | Slc2a1              | 386.1±16.4    | 260.1±22.5   | 1355.3±27.3  | 55.5±48.7    | 1891.6±678.2  | 1442.8±99.2   |
| 1443579_s_at |                   |                     | 17.6±1.6      | 40.3±2.7     | 37.1±3.5     | 13.3±1.2     | 36.6±11.8     | 40.8±5.2      |
| 1435140_at   | 15925             | Ide                 | 255.8±74.4    | 477.2±119    | 878.6±48.6   | 136.1±38.8   | 775.1±261.8   | 1581.8±153.8  |
| 1447260_at   | 69717             | 2410017117Rik       | 22±5.7        | 33±5.7       | 45.1±3.3     | 9.8±0.1      | 70.1±24       | 42.2±1.6      |
| 1422619_at   | 19012             | Ppap2a              | 103.7±68.6    | 223.5±42.5   | 302.1±14.6   | 41.9±24.7    | 341.6±25.4    | 334.5±30.7    |
| 1428622_at   | 97998             | Depdc6              | 60.9±5.8      | 139.7±19.8   | 130.2±1.8    | 41±16.6      | 132.9±24.8    | 132.5±31.2    |
| 1438468_at   | 347710;<br>347709 | Pramel5;<br>Pramel4 | 490.7±288.3   | 1197.6±279.9 | 1160.1±106.5 | 160.9±18     | 1491.4±520.2  | 587.8±150.3   |
| 1426358_at   | 216965            | Taok1               | 105.1±12      | 258.5±52     | 155±9.1      | 69.5±4.9     | 195.9±26.2    | 120.2±28.2    |
| 1434599_a_at | 21873             | Tjp2                | 453.5±86.9    | 601.1±104.6  | 1670.1±271   | 157.6±85.6   | 1171.2±280.8  | 2469.4±220.4  |
| 1447898_s_at |                   |                     | 284.5±40.7    | 754.3±87.4   | 613.6±102.7  | 132.6±73.6   | 499.8±119     | 563.9±77.2    |
| 1416721_s_at | 67996             | Sfrs6               | 258.8±3       | 783.4±40.5   | 561±163.5    | 97.1±46      | 480±130.3     | 720.4±197.9   |
| 1424652_at   | 232146            | BC014699            | 305.5±3.7     | 744.3±83     | 406.3±76.8   | 184±78.2     | 457.5±11.4    | 572.4±50.8    |
| 1454973_at   | 54343             | Atf7ip              | 36.6±2        | 66±13.9      | 78.9±10.7    | 19.1±2       | 53.3±17.5     | 155±3.9       |
| 1453104_at   | 26413             | Mapk1               | 392.7±20.2    | 528.4±95     | 1029.1±151.2 | 128.3±39.3   | 640.6±197.6   | 1315.3±322.1  |
| 1436979_x_at | 56275             | Rbm14               | 2544.2±2.8    | 4526.8±529.2 | 3222.1±388.8 | 1471.5±179.9 | 3465.6±103.3  | 2193.7±8.2    |
| 1451318_a_at | 17096             | Lyn                 | 112.3±40.8    | 171.4±36.8   | 203.9±49.2   | 28.9±6.5     | 165.1±9.2     | 214.9±43.1    |
| 1452094_at   | 18451             | P4ha1               | 95±13.4       | 133.5±38.9   | 127.7±22.5   | 32.2±4.1     | 117.9±25.3    | 48.9±17.6     |
| 1444991_at   |                   |                     | 39.4±13.4     | 53.4±0.4     | 20.4±6.8     | 13.9±4.5     | 44.3±3.6      | 15.2±5.8      |
| 1437361_at   | 217122            | A430060F13Rik       | 6777.4±1408.1 | 6414±335.7   | 6386.2±872.4 | 1930.3±701.4 | 7138.4±1439.7 | 3658.1±1088.1 |
| 1427347_s_at | 22151; 73710      | Tubb2a; Tubb2b      | 849.6±6.1     | 373.7±133.5  | 996.2±79.3   | 83.9±10      | 902.9±16.9    | 371.2±93.3    |
| 1418966_a_at | 66686             | DcblD1              | 265.1±91.9    | 214.6±45.2   | 134.9±43.3   | 61.1±16.6    | 249.4±28.8    | 107.9±5.8     |
| 1460646_at   | 13000             | Csnk2a2             | 518.9±38.9    | 410.6±39.3   | 348.5±10.2   | 100.2±36.7   | 423.1±26.3    | 247.4±10.6    |
| 1420477_at   | 53605             | Nap111              | 901.3±27.3    | 674±43.6     | 880.1±151.4  | 212±92.1     | 732.8±107.4   | 1581.9±21.2   |
| 1436531_at   |                   |                     | 352±63.6      | 574.4±47.6   | 299.6±58.6   | 129.7±34     | 286.6±16.6    | 203.7±8.7     |
| 1428433_at   | 15258             | Hipk2               | 40.3±14       | 35.9±0.1     | 44.8±17.5    | 9.6±0.4      | 29.1±7.7      | 51.1±9.5      |
| 1455991_at   | 229905            | Ccbl2               | 162.1±10.1    | 62.5±16.8    | 202.7±2.3    | 20.7±2.5     | 101.1±22.8    | 153.9±45.9    |

**Group 5**                      **3 genes (3 probe sets)**

| Probe set ID | Entrez gene ID | Gene symbol | cont.1.5 (n=2) | cont.2.5 (n=2) | cont.3.5 (n=2) | u2.5 (n=2) | u3.5 (n=2) | u4.5 (n=2)  |
|--------------|----------------|-------------|----------------|----------------|----------------|------------|------------|-------------|
| 1427983_at   | 208968         | Suhw3       | 162.5±43.7     | 13.9±1.6       | 76.6±12.3      | 148.1±25.5 | 41.5±0.7   | 94.2±3.9    |
| 1436048_at   | 102058         | Exoc8       | 615.3±175.5    | 136.7±11.6     | 262.2±7.1      | 376.9±13.2 | 164.2±15.3 | 441.8±114.2 |

|              |       |      |          |         |         |          |         |         |
|--------------|-------|------|----------|---------|---------|----------|---------|---------|
| 1451053_a_at | 17245 | Mdm1 | 21.5±3.5 | 6.7±0.4 | 9.3±2.8 | 42.9±7.1 | 6.5±0.3 | 9.6±4.9 |
|--------------|-------|------|----------|---------|---------|----------|---------|---------|

Group 6 58 genes (60 probe sets)

| Probe set ID | Entrez gene ID    | Gene symbol   | cont.1.5 (n=2) | cont.2.5 (n=2) | cont.3.5 (n=2) | u2.5 (n=2)   | u3.5 (n=2) | u4.5 (n=2) |
|--------------|-------------------|---------------|----------------|----------------|----------------|--------------|------------|------------|
| 1423286_at   | 12404             | Cbln1         | 704.1±28.6     | 32.6±14.1      | 16.1±5.6       | 372.2±176    | 33.1±4.3   | 12.8±3.5   |
| 1435092_at   | 11861             | Arl4a         | 325.7±13.2     | 29.2±13.3      | 16.2±0.4       | 254.2±67     | 20.7±0.6   | 17.9±8     |
| 1454867_at   | 433938;<br>634779 | Mn1           | 209.9±42.5     | 18.9±8.1       | 13.3±0.3       | 231.6±197    | 14.1±3.2   | 8.8±0.2    |
| 1429671_at   | 71970             | 2410018M08Rik | 245±16.3       | 35.8±5.9       | 19.4±0.1       | 206.6±4.7    | 19.8±12.6  | 14.5±4.5   |
| 1441098_at   | 240023            | Pnlcd1        | 603.6±93.2     | 60.2±22.9      | 65.3±12.6      | 343.3±195.2  | 53.3±7.6   | 59.5±14.7  |
| 1425280_at   | 69757             | Leng1         | 421.4±207.2    | 58.9±16.6      | 26.1±1.5       | 279.1±79.7   | 37.4±20.2  | 30.2±2     |
| 1423809_at   | 106795            | Tcf19         | 311.8±12.8     | 56.5±23.4      | 45.7±10.2      | 226.6±13.4   | 27.8±0.5   | 93.5±7.2   |
| 1457279_at   |                   |               | 491.2±35.6     | 48.6±14.5      | 55.2±0.5       | 391.4±141.3  | 44.1±8.9   | 18.1±0.1   |
| 1416490_at   | 66269             | Tmed6         | 330.1±79.6     | 68.7±3.9       | 16.5±5.6       | 210.6±0      | 30.8±3.2   | 7.2±0.2    |
| 1437924_at   | 20658             | Son           | 855.1±343.5    | 122.5±6.3      | 96.1±20.2      | 509.1±49.2   | 81.9±19.9  | 106.1±29.5 |
| 1425197_at   | 19255             | Ptpn2         | 1386.2±129.6   | 410.1±131.4    | 95.1±13.5      | 1027.4±176.7 | 145.3±11.3 | 42.8±4.1   |
| 1424237_at   | 67778             | Zfp639        | 1120.1±115.4   | 161.7±14.7     | 114.9±19.6     | 670±1.4      | 118.3±4    | 133.7±14.6 |
| 1458130_at   |                   |               | 224.9±10.3     | 27.1±4.8       | 28±7.8         | 134±92       | 24.7±7.6   | 14.7±2.1   |
| 1437693_at   | 110957            | D1Pas1        | 517.5±42.3     | 87.7±16.8      | 51.2±10.6      | 315.8±145.9  | 61.8±5.9   | 34.8±5.7   |
| 1433623_at   |                   |               | 1254.2±26.7    | 306.6±112.6    | 226.5±36.1     | 791±22.6     | 152.1±60.8 | 93.8±14.4  |
| 1431429_a_at | 11861             | Arl4a         | 658.2±64       | 127.7±29.4     | 81.1±4.3       | 403±54.1     | 84.6±1.9   | 81.1±18.9  |
| 1421273_at   | 67296             | Socs4         | 116.6±14.7     | 19.8±3.4       | 14.7±2.7       | 69.7±2.6     | 15.3±0.6   | 9.4±2.3    |
| 1421340_at   | 26408             | Map3k5        | 107.6±10.3     | 16.8±6.1       | 15.7±5.7       | 64.8±19.9    | 14.5±6.3   | 11.2±0.6   |
| 1435556_at   |                   |               | 391.3±251.7    | 58.7±18.3      | 71.5±1         | 280.9±43     | 53.2±11.1  | 63.9±20.1  |
| 1457672_at   | 109151            | Chd9          | 132.4±18.2     | 11.1±1.8       | 25.4±0.6       | 95.3±72.3    | 18.4±3.8   | 17.6±0     |
| 1429667_at   |                   |               | 533.3±206      | 74.2±5.4       | 40.1±2         | 392.1±55.9   | 78.4±48.9  | 45.6±13.2  |
| 1426832_at   | 236790            | 6330505F04Rik | 174.9±9.2      | 37.8±6.5       | 45.4±7.3       | 244.4±37.2   | 26±1.4     | 53.5±6.7   |
| 1428742_at   | 268882            | Fbxo45        | 285.6±89       | 44.8±18.7      | 26.3±5.1       | 223.2±23.9   | 43.9±16.3  | 32.6±1.1   |
| 1450026_a_at | 53625             | B3gnt1        | 198.5±9.6      | 25.1±6.9       | 41.3±7         | 181.7±40.3   | 31.1±1.8   | 32.5±4     |
| 1442099_at   | 76179             | Usp31         | 60.1±33.1      | 10.8±0.4       | 12.6±1.1       | 128.8±13.2   | 9.4±5.6    | 9.4±2.4    |
| 1449668_s_at |                   |               | 1147±276.9     | 287.7±13.2     | 286.3±83.7     | 854.5±248.8  | 184.2±40.9 | 346.4±24.7 |
| 1456914_at   |                   |               | 168±37.8       | 20.9±11.1      | 33±10.1        | 119.2±28     | 27±4.2     | 38.3±5.4   |
| 1451439_at   | 212547            | BC027231      | 2040.2±60.4    | 677.8±11.8     | 278.8±49.4     | 1642.8±511.4 | 330.1±99.8 | 242.7±53.5 |
| 1425114_at   | 19647             | Rbbp6         | 566.1±80.6     | 110.1±14.1     | 22.8±2.1       | 421.7±145.4  | 93.9±26.4  | 26.2±8.2   |
| 1426107_at   | 213389            | Prdm9         | 49.2±8.9       | 8.9±2.5        | 9.5±0.3        | 34.9±14.9    | 8.7±1.5    | 9.1±1.1    |
| 1423475_at   | 94219             | Cnm2          | 749±33.3       | 202±71.4       | 50.2±12.5      | 680.1±211.4  | 136.4±8.6  | 49±7       |
| 1423249_at   | 18087             | Nktr          | 773.3±188.7    | 246.3±6.3      | 145.9±0.5      | 818.2±143.6  | 140.9±23.8 | 134.6±14.3 |
| 1435156_at   | 230967            | BC046331      | 303.5±52.8     | 80.1±2.4       | 51.1±12        | 236.5±116.8  | 56.9±6.1   | 49.1±7.7   |
| 1417527_at   | 64933             | Ap3m2         | 69.9±2         | 9.5±0.3        | 9.2±0.2        | 51.1±1.3     | 13.5±5.5   | 8.7±0.2    |
| 1426625_at   | 78834             | Zfp623        | 794.4±23.5     | 120.7±33.8     | 191.3±32       | 530.3±88.6   | 153.3±28.9 | 137.4±4.7  |
| 1452330_a_at | 74761             | Mxra8         | 181.7±32.8     | 28.2±2         | 24.9±3.5       | 119.5±5.3    | 35.1±10.2  | 35.5±12.6  |
| 1454975_at   |                   |               | 598.9±203.2    | 124.7±16.5     | 120.4±33.4     | 678.9±1.4    | 118.5±44.1 | 166±23.7   |
| 1417773_at   | 94181             | Nans          | 920.2±214.1    | 209.5±23.8     | 138.7±26.9     | 565.8±1.4    | 186.9±70.6 | 200.7±57.3 |
| 1419301_at   | 14366             | Fzd4          | 86.2±49.8      | 15.3±0.9       | 12.8±0.1       | 123.9±30     | 18±7.4     | 19.1±2.7   |
| 1449813_at   | 22693             | Zfp30         | 46.8±16.7      | 9.2±1.4        | 8.8±0.9        | 35.3±14.6    | 10.2±1.2   | 8.3±0.8    |

|              |        |               |              |              |            |              |              |             |
|--------------|--------|---------------|--------------|--------------|------------|--------------|--------------|-------------|
| 1423539_at   | 18861  | Pms2          | 358.2±32.1   | 86.5±12.8    | 83.6±11    | 245.7±44.7   | 81.6±27.2    | 98.9±7.5    |
| 1441045_at   |        |               | 182.1±2.3    | 34.1±7.8     | 28.5±14.8  | 177.3±48.7   | 42.2±12      | 46.2±12.8   |
| 1435366_at   | 233865 | D430042O09Rik | 38±2.9       | 11.4±4.3     | 12±1.2     | 25.9±4.2     | 9.2±0.6      | 12.4±2.4    |
| 1427879_at   | 69171  | 1810031K17Rik | 2741.3±823.5 | 697.5±23.7   | 504.4±33.2 | 1950.6±796   | 666.3±114.3  | 395±90.2    |
| 1460673_at   | 14287  | Fpgs          | 299.4±6.5    | 92.3±1.9     | 70.7±4     | 212.9±41.9   | 73.1±11      | 55.7±0.2    |
| 1435430_at   | 216131 | Tmem1         | 1990.5±136.7 | 413.2±85.2   | 534.5±18.8 | 1369.2±179.8 | 501.1±51.3   | 625±12.5    |
| 1424175_at   | 21685  | Tef           | 151.6±34.8   | 43.8±6.3     | 26.9±1.1   | 204.6±45.1   | 38.4±17.2    | 37.8±3.2    |
| 1424611_x_at | 227682 | Trub2         | 5223.2±258.2 | 1168.7±321.5 | 1308.3±471 | 4213.2±18.1  | 1343.3±501.2 | 768.7±271.6 |
| 1434405_at   | 216742 | A730024A03Rik | 289.4±36.1   | 88.7±44.2    | 80.9±28.9  | 323.5±11.2   | 74.6±16.7    | 76.4±1.6    |
| 1451553_at   | 11875  | Art5          | 40.7±12.6    | 12.6±0.9     | 10.4±1.3   | 46.3±2.6     | 10.5±0.8     | 11.3±2      |
| 1445274_at   |        |               | 42.7±15.4    | 14.1±6.4     | 9.8±0.5    | 40.4±6.2     | 11±0.5       | 10.5±0.9    |
| 1456280_at   | 269582 | Clspn         | 757.9±27.1   | 197.5±25.9   | 227.9±17.8 | 523.2±42.5   | 197±16.6     | 157.4±0.3   |
| 1451408_at   | 227682 | Trub2         | 225.3±16     | 45.7±22.7    | 51±12.3    | 158.9±44     | 59.2±0.2     | 32.6±2.5    |
| 1420617_at   | 67579  | Cpeb4         | 800.1±28.5   | 183.2±5.7    | 139.2±14.9 | 561.4±215.6  | 216.8±52.7   | 90.9±0.4    |
| 1455877_a_at |        |               | 113.1±42.6   | 32.4±9.7     | 25.2±4.3   | 134.1±39.7   | 31.3±3.7     | 17.8±1.2    |
| 1423233_at   | 12609  | Cebpd         | 55.6±25.5    | 11±2         | 6.7±0      | 53.9±14      | 15.6±5       | 9±1.1       |
| 1450292_a_at | 67981  | Hormad1       | 179.3±45.2   | 49.6±11.2    | 47.7±25.5  | 173.1±11.2   | 50.9±10.4    | 36.9±6.9    |
| 1417464_at   | 21925  | Tnnc2         | 53±0.4       | 14.2±1.2     | 15.4±4.2   | 69.5±34.9    | 15.3±3.1     | 14.8±5.7    |
| 1444628_at   | 110751 | Adam33        | 21.4±10.7    | 6.8±0        | 5.9±0.5    | 24.4±5.6     | 6.6±0.1      | 6.4±0.1     |
| 1455353_at   | 330401 | Tmcc1         | 107.8±28.4   | 25.4±5.1     | 19±4.4     | 87±5         | 34.7±5.8     | 29.4±10.7   |

**Group 7** 6 genes (6 probe sets)

| Probe set ID | Entrez Gene ID | Gene Symbol | cont.1.5 (n=2) | cont.2.5 (n=2) | cont.3.5 (n=2) | u2.5 (n=2) | u3.5 (n=2)  | u4.5 (n=2) |
|--------------|----------------|-------------|----------------|----------------|----------------|------------|-------------|------------|
| 1416316_at   | 26458          | Slc27a2     | 768.4±98.8     | 218.3±99.1     | 32±8.6         | 372±142.3  | 459.6±216.6 | 82.4±60.6  |
| 1428776_at   | 75750          | Slc10a6     | 378±2.3        | 210.1±50.1     | 39.8±31.2      | 328.4±33.8 | 225.4±0.2   | 71.2±35.5  |
| 1417649_at   | 12577          | Cdkn1c      | 152.4±88.7     | 41.4±1.1       | 21.8±6         | 64.4±12.5  | 109.8±31.8  | 34.7±2     |
| 1455498_at   | 14765          | Gpr50       | 84±20.9        | 48±1.8         | 12.6±5         | 68±32.3    | 50.5±14.5   | 11.6±1.4   |
| 1416590_a_at | 19376          | Rab34       | 109.7±0.8      | 78±5.4         | 20.6±1.9       | 183.6±48.5 | 77.3±27.8   | 17.5±6     |
| 1418355_at   | 53322          | Nucb2       | 212.4±56.7     | 422.9±21.7     | 70.1±9.9       | 645.5±81.3 | 170.2±20.1  | 51.7±0.4   |

**Group 8** 115 genes (119 probe sets)

| Probe set ID | Entrez gene ID   | Gene symbol   | cont.1.5 (n=2) | cont.2.5 (n=2) | cont.3.5 (n=2) | u2.5 (n=2)  | u3.5 (n=2) | u4.5 (n=2) |
|--------------|------------------|---------------|----------------|----------------|----------------|-------------|------------|------------|
| 1434881_s_at | 239217           | Kctd12        | 30.8±5.5       | 10.3±0.2       | 7.1±1.7        | 32.9±13.8   | 6.6±0.1    | 7.1±0.9    |
| 1450071_at   | 192195           | Ash1l         | 343.4±1.7      | 121.4±15.7     | 122.1±6.5      | 374±194.1   | 89.6±12    | 118±29.8   |
| 1455999_at   | 105594           | C330003B14Rik | 857±102.1      | 303.6±55.1     | 93.8±46.5      | 1013.8±71.2 | 163.6±50.4 | 15.3±0     |
| 1441753_at   |                  |               | 24.6±5.4       | 8.4±0.4        | 16.1±0.6       | 28.4±1.2    | 9.2±4.6    | 28.3±5.6   |
| 1435742_at   | 68734            | 1110034C04Rik | 224.1±34.6     | 89.8±1         | 38.9±0.8       | 272.3±12.7  | 56.1±13.6  | 41.4±1.7   |
| 1419234_at   | 117599           | Helb          | 47.7±9.1       | 17.5±3.4       | 19.5±5.4       | 57.4±21.6   | 17.2±1.1   | 13.7±2.3   |
| 1439979_at   |                  |               | 35.4±14.1      | 12.2±0.3       | 13.5±3         | 41.9±5.7    | 15.3±1.1   | 14.4±1.8   |
| 1419165_at   | 26466;<br>635007 | Zfp260        | 197.1±82.6     | 70.8±11.4      | 79.3±5         | 237.3±27.9  | 83.5±2     | 47.7±7.5   |
| 1436495_s_at | 26466            | Zfp260        | 187.5±69.4     | 75.4±19.6      | 82.7±19.6      | 227.8±38.9  | 91±3.2     | 67.2±0.4   |
| 1428731_at   | 78787            | Usp54         | 332.8±67.8     | 145.4±18.1     | 48.6±8.2       | 455.2±80.3  | 57.8±0     | 36.9±7.5   |
| 1460453_at   | 72536            | Tagap1        | 244.3±40.4     | 97±4.1         | 84.5±3.3       | 316.5±82.4  | 107.4±16.2 | 86.2±31.3  |

|              |        |               |            |            |            |              |             |             |
|--------------|--------|---------------|------------|------------|------------|--------------|-------------|-------------|
| 1424446_at   | 276905 | Armc7         | 163.1±53.1 | 61.9±6.6   | 44.7±5.3   | 226.1±2.1    | 53.2±7.7    | 39.8±10.9   |
| 1460722_at   | 223920 | Soat2         | 19.1±10.4  | 7.4±0.4    | 6.4±0.6    | 28.2±4.6     | 6.9±0.1     | 6±0.7       |
| 1431031_at   | 94246  | Arid4b        | 15.1±2.2   | 7.2±0.2    | 6.6±1.1    | 22.4±12.5    | 6.4±0       | 6.2±0.1     |
| 1430318_at   | 69215  | Sat2          | 245.4±49.7 | 90.1±33.6  | 36.3±1.8   | 435.2±198.5  | 41±7.3      | 29.4±8.7    |
| 1456904_at   |        |               | 17±4.1     | 6.4±0.9    | 10.2±0.3   | 23.2±4.7     | 10.5±0      | 9.9±0.6     |
| 1454798_at   |        |               | 48.1±10.6  | 24±1.5     | 24.3±9.5   | 72.1±16.4    | 24.6±4.8    | 19.4±0.2    |
| 1419569_a_at | 57444  | lsg20         | 25.8±6     | 10.4±0     | 8.8±0.2    | 40.9±1.4     | 11.1±2.3    | 9.4±0.3     |
| 1423083_at   | 19338  | Rab33b        | 306.7±12.6 | 119.8±33.5 | 163.6±35.4 | 485.9±59.9   | 140.1±41.6  | 164±20.7    |
| 1417190_at   | 59027  | Pbef1         | 365.6±130  | 186.5±16.2 | 179±39.6   | 633.6±272.8  | 123.6±19.6  | 162.3±18.4  |
| 1429125_at   | 474156 | Zbtb9         | 257.7±86.8 | 105.4±0.8  | 156.3±0.3  | 355.3±44.3   | 173.3±12.6  | 126.7±16.4  |
| 1417316_at   | 66834  | Them2         | 252.4±16.1 | 97.5±8.6   | 88.8±16.4  | 393.6±74.6   | 137.1±57.4  | 229.5±53.8  |
| 1420061_s_at | 100552 | AA675344      | 27±0.2     | 14±1.8     | 11.4±0.9   | 44.8±2.7     | 13±3.7      | 12.1±1.7    |
| 1424570_at   | 212880 | Ddx46         | 79.2±6.2   | 33.4±10.5  | 29.9±3.1   | 129.2±16.4   | 42.5±19.2   | 19.6±5.7    |
| 1449050_at   | 19687  | Recc1         | 624.6±302  | 344.1±36.3 | 367.7±50.2 | 1054.6±14.8  | 328.2±30.7  | 241.1±3.3   |
| 1439189_at   | 329679 | D630023B12Rik | 132.4±32.2 | 56.3±17    | 55.3±9.2   | 247.7±6.3    | 57.7±18.7   | 58.1±29.7   |
| 1440914_s_at |        |               | 646.9±74.2 | 351.5±17.8 | 77.8±7     | 1579.5±293.8 | 64±5.2      | 39.4±5.4    |
| 1456915_at   |        |               | 45.8±22.9  | 28.8±2.8   | 17.7±2.5   | 89.3±0.4     | 19.1±4.9    | 21.7±0.7    |
| 1418170_a_at | 142682 | Zcchc14       | 49.9±24.3  | 17.9±1.7   | 16.4±0.8   | 90.1±34.4    | 27±6.8      | 21.9±1.4    |
| 1430222_at   |        |               | 20.9±2.6   | 11±4       | 11.6±1.9   | 39.3±7.4     | 10.6±0.1    | 7.6±0.5     |
| 1447432_s_at |        |               | 516.8±74.7 | 275.9±31.2 | 309.4±26.8 | 962.9±288.2  | 273.7±47.1  | 329.8±52.4  |
| 1450184_s_at | 21685  | Tef           | 18.8±0.3   | 10.1±1.8   | 10.3±0.3   | 35.1±2.7     | 10.3±0      | 10.4±0.5    |
| 1455567_at   |        |               | 71.8±15.3  | 45.1±6.7   | 21.8±2.3   | 175.6±52.6   | 22.8±10.6   | 27.4±0.5    |
| 1429795_at   | 69291  | 1700001L05Rik | 50.3±12.2  | 28±10      | 14.4±1.2   | 115.5±62.6   | 23.1±4      | 21.7±2.7    |
| 1434724_at   | 76179  | Usp31         | 72.1±22.7  | 54.7±3.2   | 31.1±7     | 173.1±26.2   | 31.1±6      | 21.1±1.4    |
| 1418109_at   | 14853  | Gspt2         | 131.5±22.3 | 69±4.4     | 97.5±18.7  | 227.5±27.9   | 93.1±16.4   | 62.8±7.8    |
| 1438944_at   |        |               | 33.2±13.9  | 13.7±1     | 12.4±2     | 82.2±19.7    | 14.5±2.4    | 10.5±3      |
| 1453195_at   | 68112  | Sdccag3       | 28.6±1.8   | 20±6.4     | 18.7±1     | 64.6±13.8    | 16.3±1.5    | 16.3±2.5    |
| 1426979_at   | 208104 | Mlxip         | 95.8±19.7  | 79±21.4    | 24.2±1.3   | 267±43.2     | 41.2±4      | 65±1.5      |
| 1457302_at   |        |               | 120.2±10.1 | 69±12.2    | 65.3±6.7   | 250.9±36.5   | 79.4±17.3   | 47.2±16.4   |
| 1438575_a_at | 72997  | 2900056M20Rik | 22.2±4.5   | 15.2±0.8   | 11±1.3     | 51.1±17.9    | 13.7±4.2    | 11.8±1.2    |
| 1448706_at   | 56196  | Ttrap         | 791.1±98.9 | 448±100    | 369.6±67.4 | 1934.8±227.9 | 457.8±26.1  | 616.3±304.9 |
| 1446737_a_at |        |               | 34.5±0.9   | 22.1±4.4   | 38±6.8     | 68.1±16.8    | 24.9±0.8    | 57.1±5.4    |
| 1422787_at   | 56299  | Fkbpl         | 91.4±30    | 52.8±7.3   | 31.2±7.6   | 293±123.4    | 35.9±3      | 18.6±2.1    |
| 1454835_at   | 77781  | Epm2aip1      | 52.4±6.5   | 17.7±4.2   | 22.4±1.3   | 175.2±13     | 20±11.9     | 20.3±0.1    |
| 1449773_s_at | 17873  | Gadd45b       | 194.4±61.4 | 69.9±9.7   | 44.1±15.5  | 574.9±61.6   | 97.7±15.3   | 44±14.5     |
| 1452919_a_at | 67078  | 1700012G19Rik | 925.8±21.7 | 692.5±28.3 | 669.9±26   | 2255.2±86.6  | 604.2±114.9 | 462.8±22    |
| 1448257_at   | 13340  | Slc29a2       | 17.4±2.3   | 14.8±5.6   | 8.3±0.8    | 51.5±28.2    | 9.4±0.8     | 6.9±0.2     |
| 1418868_at   | 13799  | En2           | 22.9±12.4  | 14.7±0.1   | 10±1.9     | 72.1±8.3     | 11.8±0.2    | 15.5±4.9    |
| 1447336_at   |        |               | 16.7±6.9   | 11.4±2.2   | 8.7±0.3    | 41.5±9.5     | 11±0.9      | 10.4±1.1    |
| 1427344_s_at | 75141  | Rasd2         | 20.6±6     | 7.1±2.1    | 6.8±1.9    | 84.4±2.7     | 7±2.1       | 6.3±1.6     |
| 1418100_at   | 80515  | A030009H04Rik | 42±8.4     | 24.7±5.2   | 14.5±0     | 129.2±72.2   | 24±11.6     | 15.5±0.7    |
| 1438740_at   | 18108  | Nmt2          | 181.5±44.2 | 106.4±17.9 | 120.9±26.8 | 359.3±69.9   | 146.6±25.7  | 123.1±26.3  |
| 1416598_at   | 83396  | Glis2         | 92.9±1.8   | 118.6±9.4  | 18.3±0.2   | 396.7±162.7  | 33.7±10     | 16±4        |
| 1438256_at   |        |               | 94.2±60.3  | 61.9±7.3   | 32.7±21.8  | 422.1±32.1   | 46±0.6      | 18.4±2      |
| 1443842_at   | 99371  | Arfgef2       | 9.2±0.5    | 7.2±0.2    | 6.6±0.6    | 27.7±10.2    | 6.6±0.4     | 7.1±0       |

|              |        |               |             |              |             |              |            |              |
|--------------|--------|---------------|-------------|--------------|-------------|--------------|------------|--------------|
| 1445368_at   |        |               | 51.4±1      | 54.5±3.3     | 29.3±12.2   | 196.2±47     | 34.8±2.7   | 25±6.8       |
| 1443691_at   |        |               | 7.3±0.2     | 6.2±0.2      | 5.9±0.3     | 19.2±4.4     | 6±0.2      | 5.9±0.1      |
| 1428970_at   | 72117  | Mak3          | 1112.6±68.8 | 1019.9±237.7 | 824.5±118.8 | 3669.3±672.5 | 828.9±52.5 | 513.8±250.2  |
| 1423835_at   | 218820 | Zfp503        | 26.4±4.5    | 29.5±7.6     | 15.9±3.4    | 94.1±13.3    | 21.9±2.9   | 17.8±4.8     |
| 1455638_at   | 79233  | Zfp319        | 34.8±21.2   | 26.9±1.9     | 14.7±2.8    | 110.4±32.1   | 30.2±4.9   | 10.7±1.2     |
| 1419639_at   | 13642  | Efnb2         | 539.7±98.8  | 287.7±70.8   | 673.5±172   | 1206.3±243.5 | 501.1±65.1 | 2381.1±189.9 |
| 1425163_at   | 224833 | Al661453      | 229.8±27    | 299±60       | 152.6±5.8   | 1064.5±97.6  | 182.2±12   | 193.8±62.4   |
| 1440074_at   |        |               | 12.7±1.2    | 20.9±9.6     | 7.7±0.3     | 70.2±21.8    | 10.2±0     | 7.4±1.1      |
| 1429800_at   | 77124  | 9130221H12Rik | 18.1±4.4    | 23.9±3.2     | 24.1±10.4   | 96.7±14.1    | 15.9±5.8   | 40.9±1.9     |
| 1425779_a_at | 21380  | Tbx1          | 7.2±1.7     | 6.9±1.4      | 5.3±0.3     | 31.5±18.3    | 6.6±1      | 5.1±0.8      |
| 1424419_at   | 223664 | Lrrc14        | 41.8±9.5    | 36.5±5.5     | 49.9±2.3    | 115.9±30.1   | 40±9.3     | 52.3±0.8     |
| 1435768_at   | 94246  | Arid4b        | 109.2±19.3  | 137.7±28.6   | 124.3±37.7  | 440.8±89.2   | 104.8±6.6  | 98.6±4.4     |
| 1416149_at   | 50914  | Olig1         | 5.6±0.2     | 5.6±0.1      | 5.4±0       | 18.8±0.5     | 5.5±0      | 5.7±0.3      |
| 1438211_s_at | 13170  | Dbp           | 56.9±10.6   | 42.1±37      | 39.3±6.2    | 573.7±88     | 52.9±25.2  | 39.2±13.7    |
| 1427683_at   | 13654  | Egr2          | 9.4±0.8     | 9.1±0.3      | 8±0.5       | 101.4±58.5   | 8.7±0.8    | 8±0.8        |
| 1417363_at   | 22719  | Zfp61         | 21±2        | 18.6±4.7     | 28.9±3.1    | 63.1±8.6     | 20.7±1.8   | 42.1±10.5    |
| 1445361_at   |        |               | 13.7±1.3    | 10.1±1.1     | 9±0.7       | 46.9±3.7     | 13.6±3.8   | 10.4±3.6     |
| 1419135_at   | 16994  | Ltb           | 19.5±3.4    | 24.5±2.1     | 10.3±1.3    | 298.5±284.1  | 19±0.3     | 9.2±2.5      |
| 1453125_at   | 20666  | Sox11         | 6.3±0.1     | 9.5±4.3      | 6±0.2       | 35.5±3.3     | 6.3±0.1    | 6±0          |
| 1440256_at   |        |               | 9±0.3       | 10.9±1       | 10.2±0      | 430.8±244.3  | 10.3±2     | 8.7±0.2      |
| 1418290_a_at | 14055  | Ezh1          | 10.5±1      | 8.2±0.1      | 12.9±2.7    | 36.5±5.3     | 10.7±2.6   | 11.1±0.1     |
| 1456901_at   |        |               | 7.2±0.2     | 8.9±1.7      | 6.5±0       | 56.9±21      | 7.6±0.7    | 7.1±0.2      |
| 1434569_at   | 231151 | AA474455      | 64.9±16.1   | 61.9±18.1    | 87.1±30.6   | 201±0.3      | 66.5±4.2   | 87.6±4.8     |
| 1447933_at   | 238403 | Kif26a        | 12.1±1      | 12.7±2.4     | 18.6±3.6    | 180.8±135.5  | 14.3±1.2   | 13.2±0       |
| 1420585_a_at | 83454  | Nxf2          | 20.6±8.9    | 56.2±6.7     | 13±0.3      | 345.1±67.2   | 25.2±6.7   | 9.5±2.6      |
| 1419340_at   | 83456  | Mov10l1       | 56.2±8.7    | 53.6±3.6     | 103.5±17    | 280.9±5.9    | 60.4±16.7  | 61±17.5      |
| 1455626_at   |        |               | 7.1±0.6     | 6.9±0.1      | 5.8±0       | 29.7±10.4    | 7.5±1.8    | 5.8±0.1      |
| 1429976_at   | 76499  | Clasp2        | 10.6±0.6    | 17.3±6.4     | 10.6±0.7    | 97.9±1.8     | 12.7±6.5   | 13.4±5.9     |
| 1418174_at   | 13170  | Dbp           | 9.6±1.2     | 9.1±0.2      | 10.3±2      | 43.1±19.4    | 10.4±2.7   | 8.5±0.3      |
| 1426470_at   | 21374  | Tbp           | 6.2±0.4     | 6.2±0.1      | 5.7±0.1     | 19.9±1.3     | 6.5±2.7    | 5.8±0.2      |
| 1439381_x_at | 277010 | Marveld1      | 29.3±3.8    | 28.1±0.1     | 17.8±4      | 146.2±23     | 32.4±10    | 17.9±4.2     |
| 1456140_at   | 624168 |               | 11.8±4.4    | 18.1±5.1     | 18.2±1.4    | 143.7±6.9    | 16.1±4.2   | 23.8±7.1     |
| 1426420_at   | 74213  | 1700009P03Rik | 30±6.2      | 17.2±1.7     | 34±5.8      | 74.2±5.3     | 31.6±4     | 21.9±8.1     |
| 1453851_a_at | 23882  | Gadd45g       | 14.8±1.8    | 10.5±0.4     | 42.3±18.2   | 355±309.7    | 27.4±2.4   | 136±9.4      |
| 1418517_at   | 16373  | Irx3          | 6.1±0.4     | 8.5±1.4      | 8±0         | 28.1±14      | 7±2.1      | 18±2.1       |
| 1437305_at   | 228491 | 6430601A21Rik | 58±11.2     | 65.9±6.1     | 49.2±10.5   | 249.1±76.1   | 66.6±0.7   | 24.4±13      |
| 1435117_a_at | 217378 | C330021A05Rik | 6.4±0.7     | 10.2±2.7     | 8.3±0.1     | 35.3±11.1    | 7.7±0.5    | 11.7±2.3     |
| 1448877_at   | 13392  | Dlx2          | 8.1±0.3     | 8.7±0.4      | 7.9±0.7     | 37.3±12.9    | 9.5±2.7    | 6.2±0.8      |
| 1448698_at   | 12443  | Ccnd1         | 9.7±0.3     | 9.8±2.6      | 6.8±0.1     | 46.9±2.7     | 11.5±6.4   | 6.2±0.9      |
| 1425736_at   | 12493  | Cd37          | 7.1±0.2     | 7.5±0.2      | 7.7±0.7     | 23.3±9.7     | 8.2±1.4    | 9±0.8        |
| 1460624_at   | 109045 | 6330564D18Rik | 18.3±7.2    | 35.1±0.4     | 56.2±15.2   | 194±88.5     | 30.1±17.7  | 67±3.9       |
| 1434335_at   | 239667 | Al317237      | 227.1±96.1  | 153±21.7     | 333.7±15.3  | 783.9±93.5   | 265.1±45.6 | 441.6±75.9   |
| 1442035_at   |        |               | 7.9±0.3     | 9.1±0.8      | 8±0.3       | 35.6±14.6    | 9.8±3.1    | 8.2±0        |
| 1437884_at   |        |               | 75.5±6.3    | 115.6±25.8   | 101.2±16.7  | 363.5±199    | 98±0.8     | 86.8±0       |
| 1433946_at   | 22775  | Zik1          | 7.4±0.2     | 10.9±0.6     | 23.9±12.6   | 56.5±4.2     | 12.2±5     | 11.9±4       |

|              |        |               |            |            |             |              |             |            |
|--------------|--------|---------------|------------|------------|-------------|--------------|-------------|------------|
| 1434866_x_at | 12894  | Cpt1a         | 156.3±31.3 | 130.1±18.9 | 487.4±155.3 | 503.6±163    | 192.4±24.7  | 459.1±28.5 |
| 1431265_at   |        |               | 10.7±1.2   | 15.2±1.8   | 10.1±0.7    | 65.9±16.3    | 17±7.8      | 11.5±2.8   |
| 1447788_s_at |        |               | 4.9±0.1    | 5.5±0.3    | 6.3±2.1     | 48.6±21.1    | 10.1±7.2    | 9.8±2.2    |
| 1438719_at   |        |               | 12.9±0.7   | 22.2±0.5   | 16±0.3      | 67.6±35.7    | 19.8±4      | 16.3±0.4   |
| 1435880_at   | 99696  | Ankrd50       | 34.7±13.2  | 31.6±2.9   | 53.5±4.4    | 156.6±21.6   | 50.4±12.2   | 68.5±9.8   |
| 1460073_at   |        |               | 6.4±0.7    | 6.5±0      | 6.5±0.3     | 24.9±3.4     | 8.9±2.4     | 6±0.6      |
| 1428334_at   | 14628  | Ostm1         | 295.4±28   | 312±15.9   | 501.2±64.1  | 1766.9±414.4 | 494.5±144.7 | 334.9±8.9  |
| 1427114_at   | 72795  | Ttc19         | 113.1±13.5 | 151.9±18.3 | 169.6±5.4   | 525.8±105.5  | 169.6±22.5  | 130.6±47.4 |
| 1426421_s_at | 74213  | 1700009P03Rik | 120.3±7    | 101.7±20.1 | 153.9±1.4   | 379.2±6.4    | 156.4±14.9  | 99.7±3     |
| 1460483_at   |        |               | 7.7±0.2    | 14.6±3.3   | 31.7±1.7    | 84.4±1.1     | 18.8±7.2    | 18.8±6.4   |
| 1427074_at   | 245867 | Pcmt2         | 13.4±5.3   | 19±2.7     | 35.7±5.9    | 77.2±33.4    | 23.5±6.7    | 45±1.4     |
| 1444177_at   |        |               | 11.8±4.2   | 14.7±0.6   | 20.3±4.6    | 72±4.8       | 22.6±2.9    | 11±1.1     |
| 1435227_at   |        |               | 6.9±0.2    | 12.5±0.8   | 18.1±3.7    | 46.3±15.5    | 14±6.1      | 9.5±3.6    |
| 1425576_at   | 229709 | Ahcyl1        | 38.6±2.7   | 109.1±4.3  | 117.8±8.3   | 364.3±79.3   | 105.1±19.7  | 54.5±0.4   |
| 1437287_at   | 68646  | 1110020G09Rik | 7.7±3.5    | 28.6±4.9   | 35.4±2.2    | 116.3±28.3   | 31.3±18.2   | 36.9±5     |
| 1422092_at   | 18640  | Pfkfb2        | 6.9±0.1    | 15.2±7.1   | 7.3±1.4     | 52.7±3.1     | 17.7±3.4    | 6.4±1.2    |
| 1427918_a_at | 104215 | Rhoq          | 13.7±2.1   | 17.1±4.9   | 51.1±3.7    | 112.5±30.8   | 38.6±1.9    | 49.4±1.9   |
| 1435538_at   | 68364  | 0610030E20Rik | 101.8±5.6  | 239.1±58.2 | 314.8±55.1  | 736.9±155.2  | 295.2±47.7  | 358.1±71.6 |

The values represent the mean of signal log ratio (log<sub>2</sub>-fold change)±s.d.
